# Supplementary material for: A comparison of fourteen fully characterized mammalian-associated Campylobacter fetus isolates suggests that loss of defense mechanisms contribute to high genomic plasticity and subspecies evolution
Source: PeerJ journal article supplement (doi:10.7717/peerj.10586), 2021-02-16
Supplement: CF1_R2_Supplemental_Table_S1.docx [file CF1_R2_Supplemental_Table_S1.docx]

Table S1. Phenotypes of the seven *C. fetus* isolates characterised in this study

| Sample designation | Growth in > 1% glycine | H2S generation | Selenite reduction | Growth at 42°C | Phenotypic identification |
| --- | --- | --- | --- | --- | --- |
| CFF-02A725 | + | + | + | + | *C. fetus fetus* |
| CFF-09A980 | + | + | + | - | *C. fetus fetus* |
| CFF-00A031 | + | - | + | + | *C. fetus fetus* |
| CFV-08A948 | - | - | - | - | *C. fetus venerealis* biovar *venerealis* |
| CFV-08A1102 | - | - | - | - | *C. fetus venerealis* biovar *venerealis* |
| CFVi-ADRI545 | - | + | + | - | *C. fetus venerealis* biovar *intermedius* |
| CFVi-ADRI1362 | - | + | + | - | *C. fetus venerealis* biovar *intermedius* |
|  |  |  |  |  |  |

Each isolate was cultured using four different media or growth conditions as described in Methods and scored accordingly.
