# Supplementary material for: A comparison of fourteen fully characterized mammalian-associated Campylobacter fetus isolates suggests that loss of defense mechanisms contribute to high genomic plasticity and subspecies evolution
Source: PeerJ journal article supplement (doi:10.7717/peerj.10586), 2021-02-16
Supplement: CF1R_Supplemental_Table_S2.docx [file CF1R_Supplemental_Table_S2.docx]

Table S2. Short read archive information for the seven *C. fetus* isolates characterised in this study

| Study | Sample | NCBI sample | Illumina reads | PacBio reads | Nanopore reads |  |
| --- | --- | --- | --- | --- | --- | --- |
| PRJNA604600 | CFF-02A725 | SAMN13976976 | SRR12507226 | SRR12507225 | SRR12507235 |  |
|  | CFF-09A980 | SAMN13976977 | SRR12507233 | SRR12507232 | SRR12507231 |  |
|  | CFF-00A031 | SAMN13976978 | SRR12507230 | SRR12507229 | SRR12507228 |  |
|  | CFV-08A948 | SAMN13976979 | SRR12507227 | SRR12507224 | SRR12507223 |  |
|  | CFV-08A1102 | SAMN13976980 | SRR12507243 | SRR12507242 | SRR12507241 |  |
|  | CFVi-ADRI545 | SAMN13976981 | SRR12507240 | SRR12507239 | SRR12507238 |  |
|  | CFVi-ADRI1362 | SAMN13976982 | SRR12507237 | SRR12507236 | SRR12507234 |  |
|  |  |  |  |  |  |  |
