# Supplementary material for: A comparison of fourteen fully characterized mammalian-associated Campylobacter fetus isolates suggests that loss of defense mechanisms contribute to high genomic plasticity and subspecies evolution
Source: PeerJ journal article supplement (doi:10.7717/peerj.10586), 2021-02-16
Supplement: CF1R_Supplemental_Table_S4.xlsx [file CF1R_Supplemental_Table_S4.xlsx]

## Sheet: CFF-09A980-P1
Plasmid	ftype	start	end	orientation	length_bp	gene	product
CFF-09A980-P1	CDS	341	1027	+	687	soj_1 (parA_1)	Chromosome-partitioning ATPase Soj
CFF-09A980-P1	gene	341	1027	+	687	soj_1 (parA_1)
CFF-09A980-P1	CDS	1030	1239	+	210		hypothetical protein
CFF-09A980-P1	gene	1030	1239	+	210
CFF-09A980-P1	CDS	1319	2881	-	1563	traI_1	Protein TraI
CFF-09A980-P1	gene	1319	2881	-	1563	traI_1
CFF-09A980-P1	CDS	2856	3224	-	369		Dna transfer protein [Campylobacter coli]
CFF-09A980-P1	gene	2856	3224	-	369
CFF-09A980-P1	CDS	3470	3799	+	330		hypothetical protein
CFF-09A980-P1	gene	3470	3799	+	330
CFF-09A980-P1	CDS	3780	4616	+	837		putative protein [Campylobacter upsaliensis]
CFF-09A980-P1	gene	3780	4616	+	837
CFF-09A980-P1	CDS	5164	5994	+	831		putative protein [Campylobacter fetus subsp. fetus]
CFF-09A980-P1	gene	5164	5994	+	831
CFF-09A980-P1	CDS	5991	6404	+	414		Type II toxin-antitoxin system VapC family toxin [Campylobacter coli]
CFF-09A980-P1	gene	5991	6404	+	414
CFF-09A980-P1	CDS	6693	7637	+	945		Type IV secretion system protein VirB11
CFF-09A980-P1	gene	6693	7637	+	945
CFF-09A980-P1	CDS	7651	7944	+	294		Conjugal transfer protein TrbC [Campylobacter coli]
CFF-09A980-P1	gene	7651	7944	+	294
CFF-09A980-P1	CDS	7941	8231	+	291		Conjugal transfer protein TrbD [Campylobacter coli]
CFF-09A980-P1	gene	7941	8231	+	291
CFF-09A980-P1	CDS	8234	10693	+	2460	virB4_1	Type IV secretion system protein virB4
CFF-09A980-P1	gene	8234	10693	+	2460	virB4_1
CFF-09A980-P1	CDS	10690	11376	+	687		Conjugal transfer protein TrbM [Campylobacter jejuni]
CFF-09A980-P1	sig_peptide	10690	10746	+	57		putative signal peptide
CFF-09A980-P1	gene	10690	11376	+	687
CFF-09A980-P1	CDS	11378	12373	+	996		P-type conjugative transfer protein TrbJ [Campylobacter coli]
CFF-09A980-P1	gene	11378	12373	+	996
CFF-09A980-P1	CDS	12419	12673	+	255		putative protein [Campylobacter fetus subsp. fetus]
CFF-09A980-P1	gene	12419	12673	+	255
CFF-09A980-P1	CDS	12639	13856	+	1218		P-type conjugative transfer protein TrbL [Campylobacter jejuni]
CFF-09A980-P1	gene	12639	13856	+	1218
CFF-09A980-P1	CDS	13872	14558	+	687		Conjugal transfer protein TrbF [Campylobacter coli]
CFF-09A980-P1	gene	13872	14558	+	687
CFF-09A980-P1	CDS	14577	15491	+	915	virB9_1	Type IV secretion system protein virB9
CFF-09A980-P1	sig_peptide	14577	14633	+	57		putative signal peptide
CFF-09A980-P1	gene	14577	15491	+	915	virB9_1
CFF-09A980-P1	CDS	15492	15929	+	438		Multispecies: conjugal transfer protein TrbH [Bradyrhizobium]
CFF-09A980-P1	gene	15492	15929	+	438
CFF-09A980-P1	CDS	15939	17171	+	1233		Type IV secretion system protein virB10
CFF-09A980-P1	gene	15939	17171	+	1233
CFF-09A980-P1	CDS	17168	17821	+	654	virB1_1	Type IV secretion system protein virB1
CFF-09A980-P1	gene	17168	17821	+	654	virB1_1
CFF-09A980-P1	CDS	17818	18165	+	348	ssb_1	Single-stranded DNA-binding protein
CFF-09A980-P1	gene	17818	18165	+	348	ssb_1
CFF-09A980-P1	CDS	18165	18308	+	144		putative protein [Campylobacter fetus subsp. fetus]
CFF-09A980-P1	gene	18165	18308	+	144
CFF-09A980-P1	CDS	18305	20494	+	2190	traC_1	DNA primase TraC
CFF-09A980-P1	gene	18305	20494	+	2190	traC_1
CFF-09A980-P1	CDS	20504	22330	+	1827	traG_1	Conjugal transfer protein TraG
CFF-09A980-P1	gene	20504	22330	+	1827	traG_1
CFF-09A980-P1	CDS	22342	23049	+	708	traL_1	Protein TraL
CFF-09A980-P1	gene	22342	23049	+	708	traL_1
CFF-09A980-P1	CDS	23166	23414	+	249		hypothetical protein
CFF-09A980-P1	gene	23166	23414	+	249
CFF-09A980-P1	CDS	23398	24054	+	657	vbhT_1	Adenosine monophosphate-protein transferase VbhT
CFF-09A980-P1	gene	23398	24054	+	657	vbhT_1
CFF-09A980-P1	CDS	24115	24573	+	459		Signal peptidase I [Campylobacter coli]
CFF-09A980-P1	gene	24115	24573	+	459
CFF-09A980-P1	CDS	24570	24941	+	372		Conjugal transfer protein TraM [Campylobacter coli]
CFF-09A980-P1	gene	24570	24941	+	372
CFF-09A980-P1	CDS	25052	25738	+	687	soj_2 (parA_2)	Chromosome-partitioning ATPase Soj
CFF-09A980-P1	gene	25052	25738	+	687	soj_2 (parA_2)
CFF-09A980-P1	CDS	25741	25950	+	210		hypothetical protein
CFF-09A980-P1	gene	25741	25950	+	210
CFF-09A980-P1	CDS	26030	27592	-	1563	traI_2	Protein TraI
CFF-09A980-P1	gene	26030	27592	-	1563	traI_2
CFF-09A980-P1	CDS	27567	27935	-	369		Dna transfer protein [Campylobacter coli]
CFF-09A980-P1	gene	27567	27935	-	369
CFF-09A980-P1	CDS	28150	28365	+	216		D-alanyl-d-alanine carboxypeptidase [Vibrio coralliilyticus]
CFF-09A980-P1	gene	28150	28365	+	216
CFF-09A980-P1	CDS	28358	28633	+	276	yafQ	mRNA interferase toxin YafQ
CFF-09A980-P1	gene	28358	28633	+	276	yafQ
CFF-09A980-P1	CDS	28630	28980	+	351		hypothetical protein
CFF-09A980-P1	gene	28630	28980	+	351
CFF-09A980-P1	CDS	29408	29641	+	234		hypothetical protein
CFF-09A980-P1	gene	29408	29641	+	234
CFF-09A980-P1	CDS	29638	30279	+	642	vbhT_2	Adenosine monophosphate-protein transferase VbhT
CFF-09A980-P1	gene	29638	30279	+	642	vbhT_2
CFF-09A980-P1	CDS	30279	30764	+	486		Signal peptidase I [Campylobacter coli]
CFF-09A980-P1	gene	30279	30764	+	486
CFF-09A980-P1	CDS	30757	30957	+	201		Conjugal transfer protein TraM, partial [Campylobacter coli]
CFF-09A980-P1	gene	30757	30957	+	201
CFF-09A980-P1	CDS	31832	32662	+	831		putative protein [Campylobacter fetus subsp. fetus]
CFF-09A980-P1	gene	31832	32662	+	831
CFF-09A980-P1	CDS	32659	33069	+	411		Type II toxin-antitoxin system VapC family toxin [Campylobacter coli]
CFF-09A980-P1	gene	32659	33069	+	411
CFF-09A980-P1	CDS	33413	34354	+	942		Type IV secretion system protein VirB11
CFF-09A980-P1	gene	33413	34354	+	942
CFF-09A980-P1	CDS	34368	34661	+	294		Conjugal transfer protein TrbC [Campylobacter coli]
CFF-09A980-P1	gene	34368	34661	+	294
CFF-09A980-P1	CDS	34658	34948	+	291		Conjugal transfer protein TrbD [Campylobacter coli]
CFF-09A980-P1	gene	34658	34948	+	291
CFF-09A980-P1	CDS	34951	37410	+	2460	virB4_2	Type IV secretion system protein virB4
CFF-09A980-P1	gene	34951	37410	+	2460	virB4_2
CFF-09A980-P1	CDS	37407	37595	+	189		Multispecies: BRO family protein [Actinobacteria]
CFF-09A980-P1	gene	37407	37595	+	189
CFF-09A980-P1	CDS	37609	38163	+	555		Antirepressor, BRO family protein [Campylobacter coli]
CFF-09A980-P1	gene	37609	38163	+	555
CFF-09A980-P1	CDS	38160	38861	+	702		Conjugal transfer protein TrbM [Campylobacter jejuni]
CFF-09A980-P1	sig_peptide	38160	38216	+	57		putative signal peptide
CFF-09A980-P1	gene	38160	38861	+	702
CFF-09A980-P1	CDS	38863	39852	+	990		P-type conjugative transfer protein TrbJ [Campylobacter coli]
CFF-09A980-P1	gene	38863	39852	+	990
CFF-09A980-P1	CDS	39899	40171	+	273		putative protein [Campylobacter fetus subsp. fetus]
CFF-09A980-P1	gene	39899	40171	+	273
CFF-09A980-P1	CDS	40125	41345	+	1221		P-type conjugative transfer protein TrbL [Campylobacter jejuni]
CFF-09A980-P1	gene	40125	41345	+	1221
CFF-09A980-P1	CDS	41509	42192	+	684		Conjugal transfer protein TrbF [Campylobacter coli]
CFF-09A980-P1	gene	41509	42192	+	684
CFF-09A980-P1	CDS	42211	43125	+	915	virB9_2	Type IV secretion system protein virB9
CFF-09A980-P1	sig_peptide	42211	42267	+	57		putative signal peptide
CFF-09A980-P1	gene	42211	43125	+	915	virB9_2
CFF-09A980-P1	CDS	43126	43563	+	438		Multispecies: conjugal transfer protein TrbH [Bradyrhizobium]
CFF-09A980-P1	gene	43126	43563	+	438
CFF-09A980-P1	CDS	43573	44805	+	1233		Type IV secretion system protein virB10
CFF-09A980-P1	gene	43573	44805	+	1233
CFF-09A980-P1	CDS	44802	45455	+	654	virB1_2	Type IV secretion system protein virB1
CFF-09A980-P1	gene	44802	45455	+	654	virB1_2
CFF-09A980-P1	CDS	45452	45799	+	348	ssb_2	Single-stranded DNA-binding protein
CFF-09A980-P1	gene	45452	45799	+	348	ssb_2
CFF-09A980-P1	CDS	45799	45942	+	144		putative protein [Campylobacter fetus subsp. fetus]
CFF-09A980-P1	gene	45799	45942	+	144
CFF-09A980-P1	CDS	45939	48128	+	2190	traC_2	DNA primase TraC
CFF-09A980-P1	gene	45939	48128	+	2190	traC_2
CFF-09A980-P1	CDS	48138	49964	+	1827	traG_2	Conjugal transfer protein TraG
CFF-09A980-P1	gene	48138	49964	+	1827	traG_2
CFF-09A980-P1	CDS	49976	50683	+	708	traL_2	Protein TraL
CFF-09A980-P1	gene	49976	50683	+	708	traL_2
CFF-09A980-P1	CDS	50800	51048	+	249		hypothetical protein
CFF-09A980-P1	gene	50800	51048	+	249
CFF-09A980-P1	CDS	51032	51688	+	657	vbhT_3	Adenosine monophosphate-protein transferase VbhT
CFF-09A980-P1	gene	51032	51688	+	657	vbhT_3
CFF-09A980-P1	CDS	51749	52207	+	459		Signal peptidase I [Campylobacter coli]
CFF-09A980-P1	gene	51749	52207	+	459

## Sheet: CFF-00A031-P1
Plasmid	ftype	start	end	orientation	length_bp	gene	product
CFF-00A031-P1	CDS	38	316	+	279		Type II toxin-antitoxin system VapC family toxin [Campylobacter coli]
CFF-00A031-P1	gene	38	316	+	279
CFF-00A031-P1	CDS	660	1601	+	942		Type IV secretion system protein VirB11
CFF-00A031-P1	gene	660	1601	+	942
CFF-00A031-P1	CDS	1615	1908	+	294		Conjugal transfer protein TrbC [Campylobacter coli]
CFF-00A031-P1	gene	1615	1908	+	294
CFF-00A031-P1	CDS	1905	2195	+	291		Conjugal transfer protein TrbD [Campylobacter coli]
CFF-00A031-P1	gene	1905	2195	+	291
CFF-00A031-P1	CDS	2198	4657	+	2460	virB4	Type IV secretion system protein virB4
CFF-00A031-P1	gene	2198	4657	+	2460	virB4
CFF-00A031-P1	CDS	4654	5193	+	540		Antirepressor, BRO family protein [Campylobacter coli]
CFF-00A031-P1	gene	4654	5193	+	540
CFF-00A031-P1	CDS	5190	5891	+	702		Conjugal transfer protein TrbM [Campylobacter jejuni]
CFF-00A031-P1	sig_peptide	5190	5246	+	57		putative signal peptide
CFF-00A031-P1	gene	5190	5891	+	702
CFF-00A031-P1	CDS	5893	6882	+	990		putative protein [Campylobacter fetus subsp. fetus]
CFF-00A031-P1	gene	5893	6882	+	990
CFF-00A031-P1	CDS	6929	7201	+	273		putative protein [Campylobacter fetus subsp. fetus]
CFF-00A031-P1	gene	6929	7201	+	273
CFF-00A031-P1	CDS	7155	8375	+	1221		P-type conjugative transfer protein TrbL [Campylobacter jejuni]
CFF-00A031-P1	gene	7155	8375	+	1221
CFF-00A031-P1	CDS	8539	9222	+	684		Conjugal transfer protein TrbF [Escherichia coli]
CFF-00A031-P1	gene	8539	9222	+	684
CFF-00A031-P1	CDS	9241	10155	+	915	virB9	Type IV secretion system protein virB9
CFF-00A031-P1	sig_peptide	9241	9297	+	57		putative signal peptide
CFF-00A031-P1	gene	9241	10155	+	915	virB9
CFF-00A031-P1	CDS	10156	10593	+	438		Multispecies: conjugal transfer protein TrbH [Bradyrhizobium]
CFF-00A031-P1	gene	10156	10593	+	438
CFF-00A031-P1	CDS	10603	11838	+	1236		Type IV secretion system protein virB10
CFF-00A031-P1	gene	10603	11838	+	1236
CFF-00A031-P1	CDS	11831	12583	+	753		Rha family transcriptional regulator [Campylobacter coli]
CFF-00A031-P1	gene	11831	12583	+	753
CFF-00A031-P1	CDS	12576	13235	+	660	virB1	Type IV secretion system protein virB1
CFF-00A031-P1	gene	12576	13235	+	660	virB1
CFF-00A031-P1	CDS	13235	13378	+	144		putative protein [Campylobacter fetus subsp. fetus]
CFF-00A031-P1	gene	13235	13378	+	144
CFF-00A031-P1	CDS	13375	15564	+	2190	traC	DNA primase TraC
CFF-00A031-P1	gene	13375	15564	+	2190	traC
CFF-00A031-P1	CDS	15574	17400	+	1827	traG	Conjugal transfer protein TraG
CFF-00A031-P1	gene	15574	17400	+	1827	traG
CFF-00A031-P1	CDS	17412	18119	+	708	traL	Protein TraL
CFF-00A031-P1	gene	17412	18119	+	708	traL
CFF-00A031-P1	CDS	18236	18484	+	249		hypothetical protein
CFF-00A031-P1	gene	18236	18484	+	249
CFF-00A031-P1	CDS	18468	19124	+	657		Rha family transcriptional regulator [Campylobacter coli]
CFF-00A031-P1	gene	18468	19124	+	657
CFF-00A031-P1	CDS	19185	19643	+	459		Signal peptidase I [Campylobacter coli]
CFF-00A031-P1	gene	19185	19643	+	459
CFF-00A031-P1	CDS	19640	20011	+	372		Conjugal transfer protein TraM [Campylobacter coli]
CFF-00A031-P1	gene	19640	20011	+	372
CFF-00A031-P1	CDS	20122	20808	+	687	soj (parA)	Chromosome-partitioning ATPase Soj
CFF-00A031-P1	gene	20122	20808	+	687	soj (parA)
CFF-00A031-P1	CDS	20811	21020	+	210		hypothetical protein
CFF-00A031-P1	gene	20811	21020	+	210
CFF-00A031-P1	CDS	21100	22662	-	1563	traI	Protein TraI
CFF-00A031-P1	gene	21100	22662	-	1563	traI
CFF-00A031-P1	CDS	22637	23005	-	369		Dna transfer protein [Campylobacter coli]
CFF-00A031-P1	gene	22637	23005	-	369
CFF-00A031-P1	CDS	23231	23446	+	216		Related to polyketide synthase [Phialocephala subalpina]
CFF-00A031-P1	gene	23231	23446	+	216
CFF-00A031-P1	CDS	23439	23714	+	276	yafQ_2	mRNA interferase toxin YafQ
CFF-00A031-P1	gene	23439	23714	+	276	yafQ_2
CFF-00A031-P1	CDS	23711	24040	+	330		hypothetical protein
CFF-00A031-P1	gene	23711	24040	+	330
CFF-00A031-P1	CDS	24021	24767	+	747		putative protein [Campylobacter upsaliensis]
CFF-00A031-P1	gene	24021	24767	+	747
CFF-00A031-P1	CDS	25189	25323	+	135		hypothetical protein
CFF-00A031-P1	gene	25189	25323	+	135
CFF-00A031-P1	CDS	25398	25487	+	90		putative protein [Campylobacter fetus subsp. fetus]
CFF-00A031-P1	gene	25398	25487	+	90
CFF-00A031-P1	CDS	25484	25600	+	117		Type II toxin-antitoxin system VapC family toxin [Campylobacter coli]
CFF-00A031-P1	gene	25484	25600	+	117
CFF-00A031-P1	CDS	25878	26702	+	825		putative protein [Campylobacter fetus subsp. fetus]
CFF-00A031-P1	gene	25878	26702	+	825

## Sheet: CFF-04-554-P1
Plasmid	ftype	start	end	orientation	length_bp	gene	product
CFF-04-554-P1	CDS	1	408	+	408		hypothetical protein
CFF-04-554-P1	Gene	1	408	+	408
CFF-04-554-P1	CDS	575	1321	+	747		hypothetical protein
CFF-04-554-P1	Gene	575	1321	+	747
CFF-04-554-P1	CDS	1318	1677	+	360		single-stranded DNA binding protein
CFF-04-554-P1	Gene	1318	1677	+	360
CFF-04-554-P1	CDS	1812	4012	+	2201		pseudo
CFF-04-554-P1	Gene	1812	4012	+	2201
CFF-04-554-P1	CDS	4009	5834	+	1826		pseudo
CFF-04-554-P1	Gene	4009	5834	+	1826
CFF-04-554-P1	CDS	5846	6553	+	708	traL	transfer origin protein
CFF-04-554-P1	Gene	5846	6553	+	708	traL
CFF-04-554-P1	CDS	6670	6906	+	237		hypothetical protein
CFF-04-554-P1	Gene	6670	6906	+	237
CFF-04-554-P1	CDS	6899	7584	+	686		pseudo
CFF-04-554-P1	Gene	6899	7584	+	686
CFF-04-554-P1	CDS	7645	8102	+	458		pseudo
CFF-04-554-P1	Gene	7645	8102	+	458
CFF-04-554-P1	CDS	8099	8470	+	372		hypothetical protein
CFF-04-554-P1	Gene	8099	8470	+	372
CFF-04-554-P1	CDS	8581	9267	+	687	parA	plasmid partitioning protein
CFF-04-554-P1	Gene	8581	9267	+	687	parA
CFF-04-554-P1	CDS	9271	9480	+	210		hypothetical protein
CFF-04-554-P1	Gene	9271	9480	+	210
CFF-04-554-P1	CDS	9560	11122	-	1563	traI	putative relaxase
CFF-04-554-P1	Gene	9560	11122	-	1563	traI
CFF-04-554-P1	CDS	11097	11465	-	369	traJ	DNA transfer system protein
CFF-04-554-P1	Gene	11097	11465	-	369	traJ
CFF-04-554-P1	CDS	11672	12121	+	450		Pfam match to PF00583.19 Acetyltransf_1
CFF-04-554-P1	Gene	11672	12121	+	450
CFF-04-554-P1	CDS	12134	12472	+	339		hypothetical protein
CFF-04-554-P1	Gene	12134	12472	+	339
CFF-04-554-P1	CDS	12602	12739	+	138		pseudo
CFF-04-554-P1	Gene	12602	12739	+	138
CFF-04-554-P1	CDS	13078	13902	+	825		hypothetical protein
CFF-04-554-P1	Gene	13078	13902	+	825
CFF-04-554-P1	CDS	13899	14309	+	411		DNA-binding protein (VapC)
CFF-04-554-P1	Gene	13899	14309	+	411
CFF-04-554-P1	CDS	14641	15585	+	945	traB	conjugative transfer protein
CFF-04-554-P1	Gene	14641	15585	+	945	traB
CFF-04-554-P1	CDS	15606	15899	+	294	trbC	conjugative transfer protein
CFF-04-554-P1	Gene	15606	15899	+	294	trbC
CFF-04-554-P1	CDS	15896	16186	+	291	trbD	conjugative transfer protein (Pfam match to PF05101.8 VirB3)
CFF-04-554-P1	Gene	15896	16186	+	291	trbD
CFF-04-554-P1	CDS	16190	18649	+	2460	trbE	conjugative transfer protein
CFF-04-554-P1	Gene	16190	18649	+	2460	trbE
CFF-04-554-P1	CDS	18646	19200	+	555		phage antirepressor protein
CFF-04-554-P1	Gene	18646	19200	+	555
CFF-04-554-P1	CDS	19197	19904	+	708	traQ	conjugative transfer protein
CFF-04-554-P1	Gene	19197	19904	+	708	traQ
CFF-04-554-P1	CDS	19906	20886	+	981	trbJ	conjugative transfer protein
CFF-04-554-P1	Gene	19906	20886	+	981	trbJ
CFF-04-554-P1	CDS	20933	21196	+	264		hypothetical protein
CFF-04-554-P1	Gene	20933	21196	+	264
CFF-04-554-P1	CDS	21087	22382	+	1296	trbL	conjugative transfer protein
CFF-04-554-P1	Gene	21087	22382	+	1296	trbL
CFF-04-554-P1	CDS	22518	23201	+	684	trbF	conjugative transfer protein (Pfam match to PF04335.8 VirB8)
CFF-04-554-P1	Gene	22518	23201	+	684	trbF
CFF-04-554-P1	CDS	23214	24137	+	924	trbG	conjugative transfer protein
CFF-04-554-P1	Gene	23214	24137	+	924	trbG
CFF-04-554-P1	CDS	24134	24568	+	435		hypothetical protein (Pfam match to PF07283.6 TrbH)
CFF-04-554-P1	Gene	24134	24568	+	435
CFF-04-554-P1	CDS	24578	25795	+	1218	trbI	conjugative transfer protein
CFF-04-554-P1	Gene	24578	25795	+	1218	trbI

## Sheet: CFV-84-112-P1
Plasmid	ftype	start	end	orientation	length_bp	gene	product
CFV-84-112-P1	CDS	30	254	+	225	trbC	IncP-type conjugative transfer protein
CFV-84-112-P1	Gene	30	254	+	225	trbC
CFV-84-112-P1	CDS	251	541	+	291	trbD	conjugative transfer protein
CFV-84-112-P1	Gene	251	541	+	291	trbD
CFV-84-112-P1	CDS	544	3003	+	2460	trbE	conjugative transfer protein
CFV-84-112-P1	Gene	544	3003	+	2460	trbE
CFV-84-112-P1	CDS	3000	3539	+	540		BRO family Phage antirepressor protein
CFV-84-112-P1	Gene	3000	3539	+	540
CFV-84-112-P1	CDS	3536	4237	+	702	traQ	IncQ plasmid conjugative transfer protein
CFV-84-112-P1	Gene	3536	4237	+	702	traQ
CFV-84-112-P1	CDS	4239	5183	+	945	trbJ	conjugative transfer protein
CFV-84-112-P1	Gene	4239	5183	+	945	trbJ
CFV-84-112-P1	CDS	5205	5387	+	183		hypothetical protein
CFV-84-112-P1	Gene	5205	5387	+	183
CFV-84-112-P1	CDS	5384	6628	+	1245	trbL	conjugative transfer protein
CFV-84-112-P1	Gene	5384	6628	+	1245	trbL
CFV-84-112-P1	CDS	6792	7475	+	684	trbF	conjugative transfer protein
CFV-84-112-P1	Gene	6792	7475	+	684	trbF
CFV-84-112-P1	CDS	7494	8408	+	915	trbG	conjugative transfer protein
CFV-84-112-P1	Gene	7494	8408	+	915	trbG
CFV-84-112-P1	CDS	8409	8846	+	438		hypothetical protein
CFV-84-112-P1	Gene	8409	8846	+	438
CFV-84-112-P1	CDS	8856	10091	+	1236	trbI	conjugative transfer protein
CFV-84-112-P1	Gene	8856	10091	+	1236	trbI
CFV-84-112-P1	CDS	10084	10839	+	756		hypothetical protein
CFV-84-112-P1	Gene	10084	10839	+	756
CFV-84-112-P1	CDS	10823	11923	-	1101		hypothetical protein
CFV-84-112-P1	Gene	10823	11923	-	1101
CFV-84-112-P1	CDS	11901	12356	-	456		Mobile element protein
CFV-84-112-P1	Gene	11901	12356	-	456
CFV-84-112-P1	CDS	12457	13251	+	795	virD4	Type IV secretion system protein
CFV-84-112-P1	Gene	12457	13251	+	795	virD4
CFV-84-112-P1	CDS	13263	13970	+	708	traL	transfer origin protein
CFV-84-112-P1	Gene	13263	13970	+	708	traL
CFV-84-112-P1	CDS	14087	14323	+	237		hypothetical protein
CFV-84-112-P1	Gene	14087	14323	+	237
CFV-84-112-P1	CDS	14316	14987	+	672		cell filamentation-like protein
CFV-84-112-P1	Gene	14316	14987	+	672
CFV-84-112-P1	CDS	15048	15506	+	459		hypothetical protein
CFV-84-112-P1	Gene	15048	15506	+	459
CFV-84-112-P1	CDS	15503	15874	+	372		hypothetical protein
CFV-84-112-P1	Gene	15503	15874	+	372
CFV-84-112-P1	CDS	15985	16671	+	687	parA	Plasmid partitioning protein ParA
CFV-84-112-P1	Gene	15985	16671	+	687	parA
CFV-84-112-P1	CDS	16675	16884	+	210		hypothetical protein
CFV-84-112-P1	Gene	16675	16884	+	210
CFV-84-112-P1	CDS	16964	18472	-	1509	traI	traI protein, putative
CFV-84-112-P1	Gene	16964	18472	-	1509	traI
CFV-84-112-P1	CDS	18501	18869	-	369	traJ	DNA transfer system protein TraJ
CFV-84-112-P1	Gene	18501	18869	-	369	traJ
CFV-84-112-P1	CDS	19094	19309	+	216		hypothetical protein
CFV-84-112-P1	Gene	19094	19309	+	216
CFV-84-112-P1	CDS	19302	19577	+	276	yafQ	mRNA interferase toxin YafQ
CFV-84-112-P1	Gene	19302	19577	+	276	yafQ
CFV-84-112-P1	CDS	19574	19903	+	330		hypothetical protein
CFV-84-112-P1	Gene	19574	19903	+	330
CFV-84-112-P1	CDS	19884	20615	+	732		hypothetical protein
CFV-84-112-P1	Gene	19884	20615	+	732
CFV-84-112-P1	CDS	20824	20958	+	135		hypothetical protein
CFV-84-112-P1	Gene	20824	20958	+	135
CFV-84-112-P1	CDS	21329	22153	+	825		hypothetical protein
CFV-84-112-P1	Gene	21329	22153	+	825
CFV-84-112-P1	CDS	22150	22563	+	414	vapC	Type II toxin-antitoxin system VapC family toxin
CFV-84-112-P1	Gene	22150	22563	+	414	vapC
CFV-84-112-P1	CDS	22911	23807	+	897	trbB	conjugative transfer protein TrbB
CFV-84-112-P1	Gene	22911	23807	+	897	trbB
CFV-84-112-P1	CDS	23791	24891	-	1101		transposase OrfB
CFV-84-112-P1	Gene	23791	24891	-	1101
CFV-84-112-P1	CDS	24869	25324	-	456		Mobile element protein
CFV-84-112-P1	Gene	24869	25324	-	456
CFV-84-112-P1	CDS	25383	25517	-	135		hypothetical protein
CFV-84-112-P1	Gene	25383	25517	-	135
CFV-84-112-P1	CDS	25724	25999	+	276		hypothetical protein
CFV-84-112-P1	Gene	25724	25999	+	276
CFV-84-112-P1	CDS	26060	26377	+	318		hypothetical protein
CFV-84-112-P1	Gene	26060	26377	+	318
CFV-84-112-P1	CDS	26384	29137	+	2754	virB4	VirB4 protein
CFV-84-112-P1	Gene	26384	29137	+	2754	virB4
CFV-84-112-P1	CDS	29148	29894	+	747	virB5	minor pilin of type iv secretion complex
CFV-84-112-P1	Gene	29148	29894	+	747	virB5
CFV-84-112-P1	CDS	29898	31004	+	1107		hypothetical protein
CFV-84-112-P1	Gene	29898	31004	+	1107
CFV-84-112-P1	CDS	31001	31177	+	177		hypothetical protein
CFV-84-112-P1	Gene	31001	31177	+	177
CFV-84-112-P1	CDS	31174	31845	+	672	virB8	inner membrane protein, type IV secretion system
CFV-84-112-P1	Gene	31174	31845	+	672	virB8
CFV-84-112-P1	CDS	31905	32843	+	939	virB9	VirB9 protein
CFV-84-112-P1	Gene	31905	32843	+	939	virB9
CFV-84-112-P1	CDS	32836	34026	+	1191	virB10	VirB10 protein
CFV-84-112-P1	Gene	32836	34026	+	1191	virB10
CFV-84-112-P1	CDS	34016	34960	+	945	virB11	VirB11 protein
CFV-84-112-P1	Gene	34016	34960	+	945	virB11
CFV-84-112-P1	CDS	34957	36858	+	1902		hypothetical protein
CFV-84-112-P1	Gene	34957	36858	+	1902
CFV-84-112-P1	CDS	36855	37295	+	441		cpp44
CFV-84-112-P1	Gene	36855	37295	+	441
CFV-84-112-P1	CDS	37292	38020	+	729	traQ	IncQ plasmid conjugative transfer protein TraQ
CFV-84-112-P1	Gene	37292	38020	+	729	traQ
CFV-84-112-P1	CDS	38010	39053	+	1044		hypothetical protein
CFV-84-112-P1	Gene	38010	39053	+	1044
CFV-84-112-P1	CDS	39057	39746	+	690		hypothetical protein
CFV-84-112-P1	Gene	39057	39746	+	690
CFV-84-112-P1	CDS	39842	41785	+	1944		DNA topoisomerase I
CFV-84-112-P1	Gene	39842	41785	+	1944
CFV-84-112-P1	CDS	41801	42223	+	423		hypothetical protein
CFV-84-112-P1	Gene	41801	42223	+	423
CFV-84-112-P1	CDS	42348	42851	+	504		Lytic transglycosylase
CFV-84-112-P1	Gene	42348	42851	+	504
CFV-84-112-P1	CDS	42848	43870	+	1023		DNA primase
CFV-84-112-P1	Gene	42848	43870	+	1023
CFV-84-112-P1	CDS	43988	49942	+	5955		helicase
CFV-84-112-P1	Gene	43988	49942	+	5955
CFV-84-112-P1	CDS	50003	50260	-	258		hypothetical protein
CFV-84-112-P1	Gene	50003	50260	-	258
CFV-84-112-P1	CDS	50250	50813	-	564		hypothetical protein
CFV-84-112-P1	Gene	50250	50813	-	564
CFV-84-112-P1	CDS	50997	51209	-	213		hypothetical protein
CFV-84-112-P1	Gene	50997	51209	-	213
CFV-84-112-P1	CDS	51206	51964	-	759		hypothetical protein
CFV-84-112-P1	Gene	51206	51964	-	759
CFV-84-112-P1	CDS	52533	52979	+	447		hypothetical protein
CFV-84-112-P1	Gene	52533	52979	+	447
CFV-84-112-P1	CDS	53022	54188	-	1167	traR	IncQ plasmid conjugative transfer DNA nicking endonuclease
CFV-84-112-P1	Gene	53022	54188	-	1167	traR
CFV-84-112-P1	CDS	54190	54729	-	540		hypothetical protein
CFV-84-112-P1	Gene	54190	54729	-	540
CFV-84-112-P1	CDS	54947	55189	+	243		hypothetical protein
CFV-84-112-P1	Gene	54947	55189	+	243
CFV-84-112-P1	CDS	55208	55432	+	225		hypothetical protein
CFV-84-112-P1	Gene	55208	55432	+	225
CFV-84-112-P1	CDS	55432	56745	+	1314		cell filamentation-like protein
CFV-84-112-P1	Gene	55432	56745	+	1314
CFV-84-112-P1	CDS	56749	57825	-	1077		replication protein
CFV-84-112-P1	Gene	56749	57825	-	1077
CFV-84-112-P1	CDS	58080	58205	-	126		hypothetical protein
CFV-84-112-P1	Gene	58080	58205	-	126
CFV-84-112-P1	CDS	58371	58643	+	273		hypothetical protein
CFV-84-112-P1	Gene	58371	58643	+	273
CFV-84-112-P1	CDS	58637	58948	+	312		hypothetical protein
CFV-84-112-P1	Gene	58637	58948	+	312
CFV-84-112-P1	CDS	58945	59223	+	279		hypothetical protein
CFV-84-112-P1	Gene	58945	59223	+	279
CFV-84-112-P1	CDS	59402	60502	-	1101		hypothetical protein
CFV-84-112-P1	Gene	59402	60502	-	1101
CFV-84-112-P1	CDS	60480	60935	-	456		mobile element protein
CFV-84-112-P1	Gene	60480	60935	-	456

## Sheet: CFV-97-608-P1 and P2
Plasmid	ftype	start	end	orientation	length_bp	gene	product
CFV97608-P1	CDS	1	276	+	276		pseudo
CFV97608-P1	Gene	1	276	+	276
CFV97608-P1	CDS	338	655	+	318		TrbC/VirB2 family protein
CFV97608-P1	Gene	338	655	+	318
CFV97608-P1	CDS	662	3416	+	2755		pseudo (type IV secretion system protein VirB4)
CFV97608-P1	Gene	662	3416	+	2755
CFV97608-P1	CDS	3426	4172	+	747		transport associated protein 4
CFV97608-P1	Gene	3426	4172	+	747
CFV97608-P1	CDS	4176	5282	+	1107		hypothetical protein
CFV97608-P1	Gene	4176	5282	+	1107
CFV97608-P1	CDS	5279	5455	+	177		hypothetical protein
CFV97608-P1	Gene	5279	5455	+	177
CFV97608-P1	CDS	5452	6123	+	672		type IV secretion system protein
CFV97608-P1	Gene	5452	6123	+	672
CFV97608-P1	CDS	6203	7141	+	939	virB9	P-type conjugative transfer protein VirB9
CFV97608-P1	Gene	6203	7141	+	939	virB9
CFV97608-P1	CDS	7134	8327	+	1194		TrbI/VirB10 family protein
CFV97608-P1	Gene	7134	8327	+	1194
CFV97608-P1	CDS	8324	9272	+	949	cpaF	pseudo, Flp pilus assembly complex ATPase component
CFV97608-P1	Gene	8324	9272	+	949	cpaF
CFV97608-P1	CDS	9269	10054	+	786		type IV secretory system conjugative DNA transfer family protein
CFV97608-P1	Gene	9269	10054	+	786
CFV97608-P1	CDS	9993	11175	+	1183		pseudo, type IV secretory system conjugative DNA transfer family protein
CFV97608-P1	Gene	9993	11175	+	1183
CFV97608-P1	CDS	11168	11608	+	441		hypothetical protein
CFV97608-P1	Gene	11168	11608	+	441
CFV97608-P1	CDS	11605	12333	+	729		hypothetical protein
CFV97608-P1	Gene	11605	12333	+	729
CFV97608-P1	CDS	12323	13291	+	969		hypothetical protein
CFV97608-P1	Gene	12323	13291	+	969
CFV97608-P1	CDS	13295	13987	+	693		hypothetical protein
CFV97608-P1	Gene	13295	13987	+	693
CFV97608-P1	CDS	14104	16035	+	1932		type IA DNA topoisomerase
CFV97608-P1	Gene	14104	16035	+	1932
CFV97608-P1	CDS	16049	16459	+	411		hypothetical protein
CFV97608-P1	Gene	16049	16459	+	411
CFV97608-P1	CDS	16509	16949	+	441		hypothetical protein
CFV97608-P1	Gene	16509	16949	+	441
CFV97608-P1	CDS	16977	17390	+	414	ssb	single-stranded DNA-binding protein
CFV97608-P1	Gene	16977	17390	+	414	ssb
CFV97608-P1	CDS	17391	17888	+	498		lytic transglycosylase domain-containing protein
CFV97608-P1	Gene	17391	17888	+	498
CFV97608-P1	CDS	17885	18907	+	1023		hypothetical protein
CFV97608-P1	Gene	17885	18907	+	1023
CFV97608-P1	CDS	19016	23902	+	4887		DEAD/DEAH box helicase family protein
CFV97608-P1	Gene	19016	23902	+	4887
CFV97608-P1	CDS	23889	24071	+	183		hypothetical protein
CFV97608-P1	Gene	23889	24071	+	183
CFV97608-P1	CDS	24073	24963	+	891		hypothetical protein
CFV97608-P1	Gene	24073	24963	+	891
CFV97608-P1	CDS	25023	25280	-	258		hypothetical protein
CFV97608-P1	Gene	25023	25280	-	258
CFV97608-P1	CDS	25270	25833	-	564		hypothetical protein
CFV97608-P1	Gene	25270	25833	-	564
CFV97608-P1	CDS	26245	26742	+	498		hypothetical protein
CFV97608-P1	Gene	26245	26742	+	498
CFV97608-P1	CDS	26796	27434	+	639		IS607 family transposase
CFV97608-P1	Gene	26796	27434	+	639
CFV97608-P1	CDS	27448	28713	+	1266	tnpB	IS200/IS605 family element transposase accessory protein TnpB
CFV97608-P1	Gene	27448	28713	+	1266	tnpB
CFV97608-P1	CDS	28763	29218	+	456		hypothetical protein
CFV97608-P1	Gene	28763	29218	+	456
CFV97608-P1	CDS	29837	30076	+	240		type II toxin-antitoxin system HicA family toxin
CFV97608-P1	Gene	29837	30076	+	240
CFV97608-P1	CDS	30148	30507	+	360		hypothetical protein
CFV97608-P1	Gene	30148	30507	+	360
CFV97608-P1	CDS	30529	30930	+	402		hypothetical protein
CFV97608-P1	Gene	30529	30930	+	402
CFV97608-P1	CDS	30949	32115	-	1167		relaxase/mobilization nuclease domain-containing protein
CFV97608-P1	Gene	30949	32115	-	1167
CFV97608-P1	CDS	32118	32657	-	540		hypothetical protein
CFV97608-P1	Gene	32118	32657	-	540
CFV97608-P1	CDS	32876	33103	+	228		hypothetical protein
CFV97608-P1	Gene	32876	33103	+	228
CFV97608-P1	CDS	33155	33484	+	330		hypothetical protein
CFV97608-P1	Gene	33155	33484	+	330
CFV97608-P1	CDS	33469	34482	+	1014		hypothetical protein
CFV97608-P1	Gene	33469	34482	+	1014
CFV97608-P1	CDS	34487	35563	-	1077		replication initiation protein
CFV97608-P1	Gene	34487	35563	-	1077
CFV97608-P1	CDS	36151	36348	-	198		hypothetical protein
CFV97608-P1	Gene	36151	36348	-	198
CFV97608-P1	CDS	36391	37491	-	1101		transposase
CFV97608-P1	Gene	36391	37491	-	1101
CFV97608-P1	CDS	37469	37924	-	456	tnpA	IS200/IS605 family transposase
CFV97608-P1	Gene	37469	37924	-	456	tnpA
CFV97608-P2	CDS	1	741	+	741	traQ	conjugative transfer protein TraQ
CFV97608-P2	Gene	1	741	+	741	traQ
CFV97608-P2	CDS	743	1930	+	1188	trbJ	onjugative transfer protein TrbJ
CFV97608-P2	Gene	743	1930	+	1188	trbJ
CFV97608-P2	CDS	1943	2134	+	192		hypothetical protein
CFV97608-P2	Gene	1943	2134	+	192
CFV97608-P2	CDS	2131	3426	+	1296	trbL	conjugative transfer protein TrbL
CFV97608-P2	Gene	2131	3426	+	1296	trbL
CFV97608-P2	CDS	3590	4273	+	684	trbF	conjugative transfer protein TrbF
CFV97608-P2	Gene	3590	4273	+	684	trbF
CFV97608-P2	CDS	4292	5206	+	915	trbG	conjugative transfer protein TrbG
CFV97608-P2	Gene	4292	5206	+	915	trbG
CFV97608-P2	CDS	5207	5644	+	438		hypothetical protein (Pfam match to PF07283.6 TrbH)
CFV97608-P2	Gene	5207	5644	+	438
CFV97608-P2	CDS	5654	6871	+	1218	trbI	conjugative transfer protein TrbI
CFV97608-P2	Gene	5654	6871	+	1218	trbI
CFV97608-P2	CDS	6868	7659	+	792		hypothetical protein
CFV97608-P2	Gene	6868	7659	+	792
CFV97608-P2	CDS	7656	8036	+	381		pseudo, single-stranded binding protein
CFV97608-P2	Gene	7656	8036	+	381
CFV97608-P2	mobile element	7997	10064	+	2068		insertion sequence:ISCfv2H
CFV97608-P2	CDS	8100	8738	+	639		transposase, IS607 family OrfA
CFV97608-P2	Gene	8100	8738	+	639
CFV97608-P2	CDS	8725	10017	+	1293		transposase, IS605 family OrfB
CFV97608-P2	Gene	8725	10017	+	1293
CFV97608-P2	CDS	10127	11461	+	1335		pseudo, DNA primase
CFV97608-P2	Gene	10127	11461	+	1335
CFV97608-P2	CDS	11471	13312	+	1842	virD4	type IV secretion system protein VirD4
CFV97608-P2	Gene	11471	13312	+	1842	virD4
CFV97608-P2	CDS	13309	14015	+	707		pseudo, TraL
CFV97608-P2	Gene	13309	14015	+	707
CFV97608-P2	CDS	14132	14368	+	237		hypothetical protein
CFV97608-P2	Gene	14132	14368	+	237
CFV97608-P2	CDS	14361	15047	+	687	fic	cell filamentation protein Fic
CFV97608-P2	Gene	14361	15047	+	687	fic
CFV97608-P2	CDS	15108	17255	+	2148		pseudo, disrupted by IS element
CFV97608-P2	Gene	15108	17255	+	2148
CFV97608-P2	mobile element	15279	16971	+	1693		insertion sequence:ISCfv1E
CFV97608-P2	CDS	15328	16428	-	1101		transposase, IS605 family OrfB
CFV97608-P2	Gene	15328	16428	-	1101
CFV97608-P2	CDS	16406	16861	-	456		transposase, IS200 family OrfA
CFV97608-P2	Gene	16406	16861	-	456
CFV97608-P2	CDS	17252	17623	+	372		hypothetical protein
CFV97608-P2	Gene	17252	17623	+	372
CFV97608-P2	CDS	17734	18420	+	687	parA	plasmid partitioning protein ParA
CFV97608-P2	Gene	17734	18420	+	687	parA
CFV97608-P2	CDS	18424	18633	+	210		hypothetical protein
CFV97608-P2	Gene	18424	18633	+	210
CFV97608-P2	CDS	18713	20275	-	1563		putative TraI protein
CFV97608-P2	Gene	18713	20275	-	1563
CFV97608-P2	CDS	20250	20618	-	369	traJ	DNA transfer system protein TraJ
CFV97608-P2	Gene	20250	20618	-	369	traJ
CFV97608-P2	CDS	20833	21048	+	216		hypothetical protein
CFV97608-P2	Gene	20833	21048	+	216
CFV97608-P2	CDS	21041	21316	+	276	yafQ	mRNA interferase toxin YafQ
CFV97608-P2	Gene	21041	21316	+	276	yafQ
CFV97608-P2	CDS	21313	21663	+	351		hypothetical protein
CFV97608-P2	Gene	21313	21663	+	351
CFV97608-P2	CDS	22020	22175	+	156		hypothetical protein
CFV97608-P2	Gene	22020	22175	+	156
CFV97608-P2	CDS	22296	23120	+	825		hypothetical protein
CFV97608-P2	Gene	22296	23120	+	825
CFV97608-P2	CDS	23117	23527	+	411	vapC	DNA-binding protein (Type II toxin-antitoxin system VapC family toxin)
CFV97608-P2	Gene	23117	23527	+	411	vapC
CFV97608-P2	mobile element	23641	25333	+	1693		insertion sequence:ISCfv1F
CFV97608-P2	CDS	23690	24790	-	1101		transposase, IS605 family OrfB
CFV97608-P2	Gene	23690	24790	-	1101
CFV97608-P2	CDS	24768	25223	-	456		transposase, IS200 family OrfA
CFV97608-P2	Gene	24768	25223	-	456
CFV97608-P2	CDS	25334	26592	+	1259		pseudo, conjugative transfer protein TrbE
CFV97608-P2	Gene	25334	26592	+	1259
CFV97608-P2	CDS	26589	4	+	540		phage antirepressor protein, Bro-N homologue
CFV97608-P2	Gene	26589	4	+	540

## Sheet: CFV_NCTC10354-P1
Plasmid	ftype	start	end	orientation	length_bp	gene	product
CFV-NCTC10354-P1	CDS	1	369	+	369	traJ	P-type type IV conjugative transfer system protein TraJ
CFV-NCTC10354-P1	Gene	1	369	+	369	traJ
CFV-NCTC10354-P1	CDS	344	1906	+	1563		P-type type IV conjugative transfer system relaxase TraI/VirD2
CFV-NCTC10354-P1	Gene	344	1906	+	1563
CFV-NCTC10354-P1	CDS	1986	2195	-	210		hypothetical protein
CFV-NCTC10354-P1	Gene	1986	2195	-	210
CFV-NCTC10354-P1	CDS	2199	2885	-	687	parA	partitioning protein, ParA family
CFV-NCTC10354-P1	Gene	2199	2885	-	687	parA
CFV-NCTC10354-P1	CDS	2996	3367	-	372		P-type type IV conjugative transfer system protein TraM
CFV-NCTC10354-P1	Gene	2996	3367	-	372
CFV-NCTC10354-P1	CDS	3364	5511	-	2148		pseudo, P-type type IV conjugative transfer system signal peptidase TraF; gene disrupted by ISCfvt1D
CFV-NCTC10354-P1	Gene	3364	5511	-	2148
CFV-NCTC10354-P1	mobile element	3649	5341	+	1693		insertion sequence:ISCfvt1D
CFV-NCTC10354-P1	CDS	3758	4213	+	456		transposase, IS200 family
CFV-NCTC10354-P1	Gene	3758	4213	+	456
CFV-NCTC10354-P1	CDS	4191	5291	+	1101		transposase, IS605 family
CFV-NCTC10354-P1	Gene	4191	5291	+	1101
CFV-NCTC10354-P1	CDS	5572	6258	-	687		Fic domain-containing protein
CFV-NCTC10354-P1	Gene	5572	6258	-	687
CFV-NCTC10354-P1	CDS	6251	6487	-	237		hypothetical protein
CFV-NCTC10354-P1	Gene	6251	6487	-	237
CFV-NCTC10354-P1	CDS	6604	7511	-	908	traL	P-type type IV conjugative transfer system protein TraL
CFV-NCTC10354-P1	Gene	6604	7511	-	908	traL
CFV-NCTC10354-P1	CDS	7308	9149	-	1842		P-type type IV conjugative transfer system coupling protein TraG/VirD4
CFV-NCTC10354-P1	Gene	7308	9149	-	1842
CFV-NCTC10354-P1	CDS	9159	10556	-	1398		pseudo, Toprim domain-containing protein
CFV-NCTC10354-P1	Gene	9159	10556	-	1398
CFV-NCTC10354-P1	mobile element	10557	12624	-	2068		insertion sequence:ISCfvt2D
CFV-NCTC10354-P1	CDS	10603	11895	-	1293		transposase, IS607 family
CFV-NCTC10354-P1	Gene	10603	11895	-	1293
CFV-NCTC10354-P1	CDS	11882	12520	-	639		integrase/resolvase, IS607 family
CFV-NCTC10354-P1	Gene	11882	12520	-	639
CFV-NCTC10354-P1	CDS	12625	12964	-	340		pseudo, single-stranded DNA binding protein
CFV-NCTC10354-P1	Gene	12625	12964	-	340
CFV-NCTC10354-P1	CDS	12961	13752	-	792		putative lytic transglycosylase
CFV-NCTC10354-P1	Gene	12961	13752	-	792
CFV-NCTC10354-P1	CDS	13749	14966	-	1218		P-type type IV conjugative transfer system translocation pore protein TrbI/VirB10
CFV-NCTC10354-P1	Gene	13749	14966	-	1218
CFV-NCTC10354-P1	CDS	14976	15413	-	438		P-type type IV conjugative transfer system protein TrbH/VirB7
CFV-NCTC10354-P1	Gene	14976	15413	-	438
CFV-NCTC10354-P1	CDS	15414	16328	-	915		P-type type IV conjugative transfer system translocation pore protein TrbG/VirB9
CFV-NCTC10354-P1	Gene	15414	16328	-	915
CFV-NCTC10354-P1	CDS	16347	17030	-	684		P-type type IV conjugative transfer system protein TrbF/VirB8
CFV-NCTC10354-P1	Gene	16347	17030	-	684
CFV-NCTC10354-P1	CDS	17194	18489	-	1296		P-type type IV conjugative transfer system protein TrbL/VirB6
CFV-NCTC10354-P1	Gene	17194	18489	-	1296
CFV-NCTC10354-P1	CDS	18486	18677	-	192		hypothetical protein
CFV-NCTC10354-P1	Gene	18486	18677	-	192
CFV-NCTC10354-P1	CDS	18690	19877	-	1188		P-type type IV conjugative transfer system protein TrbJ/VirB5
CFV-NCTC10354-P1	Gene	18690	19877	-	1188
CFV-NCTC10354-P1	CDS	19879	20619	-	741	trbM	type IV conjugative transfer system protein TrbM
CFV-NCTC10354-P1	Gene	19879	20619	-	741	trbM
CFV-NCTC10354-P1	CDS	20616	21155	-	540		BRO domain-containing protein
CFV-NCTC10354-P1	Gene	20616	21155	-	540
CFV-NCTC10354-P1	CDS	21152	22411	-	1260		pseudo, P-type type IV conjugative transfer system ATPase TrbE/VirB4
CFV-NCTC10354-P1	Gene	21152	22411	-	1260
CFV-NCTC10354-P1	mobile element	22412	24104	+	1693		insertion sequence:ISCfvt1E
CFV-NCTC10354-P1	CDS	22521	22976	+	456		transposase, IS200 family
CFV-NCTC10354-P1	Gene	22521	22976	+	456
CFV-NCTC10354-P1	CDS	22954	24054	+	1101		transposase, IS605 family
CFV-NCTC10354-P1	Gene	22954	24054	+	1101
CFV-NCTC10354-P1	CDS	24217	24627	-	411	vapC	PIN domain-containing protein
CFV-NCTC10354-P1	Gene	24217	24627	-	411	vapC
CFV-NCTC10354-P1	CDS	24624	25448	-	825		hypothetical protein
CFV-NCTC10354-P1	Gene	24624	25448	-	825
CFV-NCTC10354-P1	CDS	25569	25724	-	156		hypothetical protein
CFV-NCTC10354-P1	Gene	25569	25724	-	156
CFV-NCTC10354-P1	CDS	26054	26887	-	834		hypothetical protein
CFV-NCTC10354-P1	Gene	26054	26887	-	834
CFV-NCTC10354-P1	CDS	26871	27221	-	351		hypothetical protein
CFV-NCTC10354-P1	Gene	26871	27221	-	351
CFV-NCTC10354-P1	CDS	27218	27493	-	276	yafQ	toxin-antitoxin system,
CFV-NCTC10354-P1	Gene	27218	27493	-	276	yafQ
CFV-NCTC10354-P1	CDS	27486	27701	-	216		hypothetical protein
CFV-NCTC10354-P1	Gene	27486	27701	-	216

## Sheet: CFV-08A948-P1
Plasmid	ftype	start	end	orientation	length_bp	gene	product
CFV-08A948-P1	CDS	1227	2096	-	870		putative protein [Campylobacter upsaliensis]
CFV-08A948-P1	gene	1227	2096	-	870
CFV-08A948-P1	CDS	2044	2394	-	351		hypothetical protein
CFV-08A948-P1	gene	2044	2394	-	351
CFV-08A948-P1	CDS	2391	2666	-	276	yafQ	mRNA interferase toxin YafQ
CFV-08A948-P1	gene	2391	2666	-	276	yafQ
CFV-08A948-P1	CDS	2659	2874	-	216		Related to polyketide synthase [Phialocephala subalpina]
CFV-08A948-P1	gene	2659	2874	-	216
CFV-08A948-P1	CDS	3089	3457	+	369		Dna transfer protein [Campylobacter coli]
CFV-08A948-P1	gene	3089	3457	+	369
CFV-08A948-P1	CDS	3432	4994	+	1563	traI	Protein TraI
CFV-08A948-P1	gene	3432	4994	+	1563	traI
CFV-08A948-P1	CDS	5074	5283	-	210		hypothetical protein
CFV-08A948-P1	gene	5074	5283	-	210
CFV-08A948-P1	CDS	5287	5976	-	690	soj_1	Chromosome-partitioning ATPase Soj
CFV-08A948-P1	gene	5287	5976	-	690	soj_1
CFV-08A948-P1	CDS	6087	6458	-	372		Conjugal transfer protein TraM [Campylobacter coli]
CFV-08A948-P1	gene	6087	6458	-	372
CFV-08A948-P1	CDS	6455	6913	-	459		Signal peptidase I [Campylobacter coli]
CFV-08A948-P1	gene	6455	6913	-	459
CFV-08A948-P1	CDS	6974	7645	-	672		Rha family transcriptional regulator [Campylobacter coli]
CFV-08A948-P1	gene	6974	7645	-	672
CFV-08A948-P1	CDS	7638	7874	-	237		hypothetical protein
CFV-08A948-P1	gene	7638	7874	-	237
CFV-08A948-P1	CDS	7991	8698	-	708	traL	Protein TraL
CFV-08A948-P1	gene	7991	8698	-	708	traL
CFV-08A948-P1	CDS	8710	10536	-	1827	traG	Conjugal transfer protein TraG
CFV-08A948-P1	gene	8710	10536	-	1827	traG
CFV-08A948-P1	CDS	10546	12735	-	2190	traC	DNA primase TraC
CFV-08A948-P1	gene	10546	12735	-	2190	traC
CFV-08A948-P1	CDS	12725	12877	-	153		putative protein [Campylobacter fetus subsp. fetus]
CFV-08A948-P1	gene	12725	12877	-	153
CFV-08A948-P1	CDS	13221	14321	-	1101		Transposase [Helicobacter pylori]
CFV-08A948-P1	gene	13221	14321	-	1101
CFV-08A948-P1	CDS	14299	14754	-	456		Is200/is605 family transposase [Helicobacter pylori]
CFV-08A948-P1	gene	14299	14754	-	456
CFV-08A948-P1	CDS	14914	15459	-	546	virB1	Type IV secretion system protein virB1
CFV-08A948-P1	gene	14914	15459	-	546	virB1
CFV-08A948-P1	CDS	15452	16204	-	753		Rha family transcriptional regulator [Campylobacter coli]
CFV-08A948-P1	gene	15452	16204	-	753
CFV-08A948-P1	CDS	16197	17432	-	1236		Type IV secretion system protein virB10
CFV-08A948-P1	gene	16197	17432	-	1236
CFV-08A948-P1	CDS	17442	17879	-	438		Multispecies: conjugal transfer protein TrbH [Bradyrhizobium]
CFV-08A948-P1	gene	17442	17879	-	438
CFV-08A948-P1	CDS	17880	18794	-	915	virB9	Type IV secretion system protein virB9
CFV-08A948-P1	gene	17880	18794	-	915	virB9
CFV-08A948-P1	sig_peptide	18738	18794	-	57		putative signal peptide
CFV-08A948-P1	CDS	18813	19499	-	687		Conjugal transfer protein TrbF [Campylobacter coli]
CFV-08A948-P1	gene	18813	19499	-	687
CFV-08A948-P1	CDS	19515	20726	-	1212		P-type conjugative transfer protein TrbL [Campylobacter coli]
CFV-08A948-P1	gene	19515	20726	-	1212
CFV-08A948-P1	CDS	20680	20898	-	219		putative protein [Campylobacter fetus subsp. fetus]
CFV-08A948-P1	gene	20680	20898	-	219
CFV-08A948-P1	CDS	20954	21913	-	960		P-type conjugative transfer protein TrbJ [Campylobacter coli]
CFV-08A948-P1	gene	20954	21913	-	960
CFV-08A948-P1	CDS	21915	22601	-	687		Conjugal transfer protein TrbM [Campylobacter jejuni]
CFV-08A948-P1	gene	21915	22601	-	687
CFV-08A948-P1	sig_peptide	22545	22601	-	57		putative signal peptide
CFV-08A948-P1	CDS	22598	24727	-	2130	virB4	Type IV secretion system protein virB4
CFV-08A948-P1	gene	22598	24727	-	2130	virB4
CFV-08A948-P1	CDS	24733	25833	-	1101		Transposase [Helicobacter pylori]
CFV-08A948-P1	gene	24733	25833	-	1101
CFV-08A948-P1	CDS	25811	26266	-	456		Is200/is605 family transposase [Helicobacter pylori]
CFV-08A948-P1	gene	25811	26266	-	456
CFV-08A948-P1	CDS	26309	26746	-	438		Conjugal transfer protein TrbE [Campylobacter coli]
CFV-08A948-P1	gene	26309	26746	-	438
CFV-08A948-P1	CDS	26749	27039	-	291		Conjugal transfer protein TrbD [Campylobacter coli]
CFV-08A948-P1	gene	26749	27039	-	291
CFV-08A948-P1	CDS	27036	27329	-	294		Conjugal transfer protein TrbC [Campylobacter coli]
CFV-08A948-P1	gene	27036	27329	-	294
CFV-08A948-P1	CDS	27343	28284	-	942		Type IV secretion system protein VirB11
CFV-08A948-P1	gene	27343	28284	-	942
CFV-08A948-P1	CDS	28585	28998	-	414		Type II toxin-antitoxin system VapC family toxin [Campylobacter coli]
CFV-08A948-P1	gene	28585	28998	-	414
CFV-08A948-P1	CDS	28995	29819	-	825		putative protein [Campylobacter fetus subsp. fetus]
CFV-08A948-P1	gene	28995	29819	-	825
CFV-08A948-P1	CDS	29939	30094	-	156		hypothetical protein
CFV-08A948-P1	gene	29939	30094	-	156
CFV-08A948-P1	CDS	30306	30437	+	132		Marr family transcriptional regulator [Rhodobacteraceae bacterium]
CFV-08A948-P1	gene	30306	30437	+	132
CFV-08A948-P1	CDS	30775	31338	+	564		Plasmid mobilization relaxosome protein MobC [Parashewanella sp.]
CFV-08A948-P1	gene	30775	31338	+	564
CFV-08A948-P1	CDS	31335	32672	+	1338		Relaxase/mobilisation nuclease domain-containing protein [Campylobacter concisus]
CFV-08A948-P1	gene	31335	32672	+	1338
CFV-08A948-P1	CDS	32681	32950	-	270		hypothetical protein
CFV-08A948-P1	gene	32681	32950	-	270
CFV-08A948-P1	CDS	32950	33870	-	921		Fic protein [Campylobacter fetus]
CFV-08A948-P1	gene	32950	33870	-	921
CFV-08A948-P1	CDS	33870	34706	-	837		Fic protein [Campylobacter fetus]
CFV-08A948-P1	gene	33870	34706	-	837
CFV-08A948-P1	CDS	34710	35141	-	432		hypothetical protein
CFV-08A948-P1	gene	34710	35141	-	432
CFV-08A948-P1	CDS	35134	35445	-	312		Nucleotidyltransferase domain-containing protein [Campylobacter fetus]
CFV-08A948-P1	gene	35134	35445	-	312
CFV-08A948-P1	CDS	35513	36175	-	663	soj_2	Chromosome-partitioning ATPase Soj
CFV-08A948-P1	gene	35513	36175	-	663	soj_2
CFV-08A948-P1	CDS	36310	37410	-	1101		Transposase [Helicobacter pylori]
CFV-08A948-P1	gene	36310	37410	-	1101
CFV-08A948-P1	CDS	37388	37843	-	456		Is200/is605 family transposase [Helicobacter pylori]
CFV-08A948-P1	gene	37388	37843	-	456
CFV-08A948-P1	CDS	38209	38622	-	414	vapC	Type II toxin-antitoxin system VapC family toxin [Campylobacter coli]
CFV-08A948-P1	gene	38209	38622	-	414	vapC

## Sheet: CFV-08A1102-P1
Plasmid	ftype	start	end	orientation	length_bp	gene	product
CFV-08A1102-P1	CDS	11	289	+	279		Relaxase/mobilisation nuclease domain-containing protein [Campylobacter concisus]
CFV-08A1102-P1	gene	11	289	+	279
CFV-08A1102-P1	CDS	298	567	-	270		hypothetical protein
CFV-08A1102-P1	gene	298	567	-	270
CFV-08A1102-P1	CDS	567	1487	-	921		Cell filamentation protein Fic [Campylobacter fetus]
CFV-08A1102-P1	gene	567	1487	-	921
CFV-08A1102-P1	CDS	1487	2323	-	837		Cell filamentation protein Fic [Campylobacter fetus]
CFV-08A1102-P1	gene	1487	2323	-	837
CFV-08A1102-P1	CDS	2327	2758	-	432		hypothetical protein
CFV-08A1102-P1	gene	2327	2758	-	432
CFV-08A1102-P1	CDS	2751	3062	-	312		Multispecies: nucleotidyltransferase domain-containing protein [Campylobacter]
CFV-08A1102-P1	gene	2751	3062	-	312
CFV-08A1102-P1	CDS	3130	3792	-	663	soj_1	Chromosome-partitioning ATPase Soj
CFV-08A1102-P1	gene	3130	3792	-	663	soj_1
CFV-08A1102-P1	CDS	3927	5027	-	1101		Transposase [Helicobacter pylori]
CFV-08A1102-P1	gene	3927	5027	-	1101
CFV-08A1102-P1	CDS	5005	5460	-	456		Is200/is605 family transposase [Helicobacter pylori]
CFV-08A1102-P1	gene	5005	5460	-	456
CFV-08A1102-P1	CDS	5826	6239	-	414	vapC	Type II toxin-antitoxin system VapC family toxin [Campylobacter coli]
CFV-08A1102-P1	gene	5826	6239	-	414	vapC
CFV-08A1102-P1	CDS	6236	7066	-	831		putative protein [Campylobacter fetus subsp. fetus]
CFV-08A1102-P1	gene	6236	7066	-	831
CFV-08A1102-P1	CDS	7614	8483	-	870		putative protein [Campylobacter upsaliensis]
CFV-08A1102-P1	gene	7614	8483	-	870
CFV-08A1102-P1	CDS	8431	8781	-	351		hypothetical protein
CFV-08A1102-P1	gene	8431	8781	-	351
CFV-08A1102-P1	CDS	8778	9053	-	276	yafQ	mRNA interferase toxin YafQ
CFV-08A1102-P1	gene	8778	9053	-	276	yafQ
CFV-08A1102-P1	CDS	9046	9261	-	216		Related to polyketide synthase [Phialocephala subalpina]
CFV-08A1102-P1	gene	9046	9261	-	216
CFV-08A1102-P1	CDS	9476	9844	+	369		Dna transfer protein [Campylobacter coli]
CFV-08A1102-P1	gene	9476	9844	+	369
CFV-08A1102-P1	CDS	9819	11381	+	1563	traI	Protein TraI
CFV-08A1102-P1	gene	9819	11381	+	1563	traI
CFV-08A1102-P1	CDS	11461	11670	-	210		hypothetical protein
CFV-08A1102-P1	gene	11461	11670	-	210
CFV-08A1102-P1	CDS	11674	12360	-	687	soj_2	Chromosome-partitioning ATPase Soj
CFV-08A1102-P1	gene	11674	12360	-	687	soj_2
CFV-08A1102-P1	CDS	12471	12842	-	372		Conjugal transfer protein TraM [Campylobacter coli]
CFV-08A1102-P1	gene	12471	12842	-	372
CFV-08A1102-P1	CDS	12839	13297	-	459		Signal peptidase I [Campylobacter coli]
CFV-08A1102-P1	gene	12839	13297	-	459
CFV-08A1102-P1	CDS	13358	14014	-	657	vbhT	Adenosine monophosphate-protein transferase VbhT
CFV-08A1102-P1	gene	13358	14014	-	657	vbhT
CFV-08A1102-P1	CDS	13998	14246	-	249		hypothetical protein
CFV-08A1102-P1	gene	13998	14246	-	249
CFV-08A1102-P1	CDS	14363	15070	-	708	traL	Protein TraL
CFV-08A1102-P1	gene	14363	15070	-	708	traL
CFV-08A1102-P1	CDS	15082	16908	-	1827	traG	Conjugal transfer protein TraG
CFV-08A1102-P1	gene	15082	16908	-	1827	traG
CFV-08A1102-P1	CDS	16918	19107	-	2190	traC	DNA primase TraC
CFV-08A1102-P1	gene	16918	19107	-	2190	traC
CFV-08A1102-P1	CDS	19104	19247	-	144		putative protein [Campylobacter fetus subsp. fetus]
CFV-08A1102-P1	gene	19104	19247	-	144
CFV-08A1102-P1	CDS	19247	19423	-	177		Single-stranded DNA-binding protein
CFV-08A1102-P1	gene	19247	19423	-	177
CFV-08A1102-P1	CDS	19587	20687	-	1101		Transposase [Helicobacter pylori]
CFV-08A1102-P1	gene	19587	20687	-	1101
CFV-08A1102-P1	CDS	20665	21120	-	456		Is200/is605 family transposase [Helicobacter pylori]
CFV-08A1102-P1	gene	20665	21120	-	456
CFV-08A1102-P1	CDS	21280	21933	-	654	virB1	Type IV secretion system protein virB1
CFV-08A1102-P1	gene	21280	21933	-	654	virB1
CFV-08A1102-P1	CDS	21930	23162	-	1233		Type IV secretion system protein virB10
CFV-08A1102-P1	gene	21930	23162	-	1233
CFV-08A1102-P1	CDS	23172	23609	-	438		Multispecies: conjugal transfer protein TrbH [Bradyrhizobium]
CFV-08A1102-P1	gene	23172	23609	-	438
CFV-08A1102-P1	CDS	23610	24524	-	915	virB9	Type IV secretion system protein virB9
CFV-08A1102-P1	gene	23610	24524	-	915	virB9
CFV-08A1102-P1	sig_peptide	24468	24524	-	57		putative signal peptide
CFV-08A1102-P1	CDS	24543	25226	-	684		Conjugal transfer protein TrbF [Campylobacter coli]
CFV-08A1102-P1	gene	24543	25226	-	684
CFV-08A1102-P1	CDS	25390	26610	-	1221		P-type conjugative transfer protein TrbL [Campylobacter jejuni]
CFV-08A1102-P1	gene	25390	26610	-	1221
CFV-08A1102-P1	CDS	26564	26836	-	273		putative protein [Campylobacter fetus subsp. fetus]
CFV-08A1102-P1	gene	26564	26836	-	273
CFV-08A1102-P1	CDS	26883	27872	-	990		P-type conjugative transfer protein TrbJ [Campylobacter coli]
CFV-08A1102-P1	gene	26883	27872	-	990
CFV-08A1102-P1	CDS	27874	28575	-	702		Conjugal transfer protein TrbM [Campylobacter jejuni]
CFV-08A1102-P1	gene	27874	28575	-	702
CFV-08A1102-P1	sig_peptide	28519	28575	-	57		putative signal peptide
CFV-08A1102-P1	CDS	28572	29111	-	540		Antirepressor, BRO family protein [Campylobacter coli]
CFV-08A1102-P1	gene	28572	29111	-	540
CFV-08A1102-P1	CDS	29108	31567	-	2460	virB4	Type IV secretion system protein virB4
CFV-08A1102-P1	gene	29108	31567	-	2460	virB4
CFV-08A1102-P1	CDS	31570	31860	-	291		Conjugal transfer protein TrbD [Campylobacter coli]
CFV-08A1102-P1	gene	31570	31860	-	291
CFV-08A1102-P1	CDS	31857	32150	-	294		Conjugal transfer protein TrbC [Campylobacter coli]
CFV-08A1102-P1	gene	31857	32150	-	294
CFV-08A1102-P1	CDS	32164	33105	-	942		Type IV secretion system protein VirB11
CFV-08A1102-P1	gene	32164	33105	-	942
CFV-08A1102-P1	CDS	33407	33820	-	414	vapC	Type II toxin-antitoxin system VapC family toxin [Campylobacter coli]
CFV-08A1102-P1	gene	33407	33820	-	414	vapC
CFV-08A1102-P1	CDS	33817	34641	-	825		putative protein [Campylobacter fetus subsp. fetus]
CFV-08A1102-P1	gene	33817	34641	-	825
CFV-08A1102-P1	CDS	34761	34916	-	156		hypothetical protein
CFV-08A1102-P1	gene	34761	34916	-	156
CFV-08A1102-P1	CDS	35128	35259	+	132		Marr family transcriptional regulator [Rhodobacteraceae bacterium]
CFV-08A1102-P1	gene	35128	35259	+	132
CFV-08A1102-P1	CDS	35597	36160	+	564		Plasmid mobilization relaxosome protein MobC [Parashewanella sp.]
CFV-08A1102-P1	gene	35597	36160	+	564

## Sheet: CFVi-03-293-P1 to P3
Plasmid	ftype	start	end	orientation	length_bp	gene	product
CFVI03293-P1	CDS	1	1038	+	1038		hypothetical protein
CFVI03293-P1	Gene	1	1038	+	1038
CFVI03293-P1	CDS	1158	3152	+	1995		DNA topoisomerase III
CFVI03293-P1	Gene	1158	3152	+	1995
CFVI03293-P1	CDS	3180	3584	+	405		hypothetical protein
CFVI03293-P1	Gene	3180	3584	+	405
CFVI03293-P1	CDS	3577	4002	+	426		hypothetical protein
CFVI03293-P1	Gene	3577	4002	+	426
CFVI03293-P1	CDS	4064	4312	+	249		hypothetical protein
CFVI03293-P1	Gene	4064	4312	+	249
CFVI03293-P1	CDS	4405	5688	+	1284		hypothetical protein
CFVI03293-P1	Gene	4405	5688	+	1284
CFVI03293-P1	CDS	5688	6395	+	708		hypothetical protein
CFVI03293-P1	Gene	5688	6395	+	708
CFVI03293-P1	CDS	6396	7199	+	804		hypothetical protein
CFVI03293-P1	Gene	6396	7199	+	804
CFVI03293-P1	CDS	7210	7542	+	333		hypothetical protein
CFVI03293-P1	Gene	7210	7542	+	333
CFVI03293-P1	CDS	7542	7832	+	291		hypothetical protein
CFVI03293-P1	Gene	7542	7832	+	291
CFVI03293-P1	CDS	7937	8437	+	501		hypothetical protein
CFVI03293-P1	Gene	7937	8437	+	501
CFVI03293-P1	CDS	8438	10297	+	1860		hypothetical protein
CFVI03293-P1	Gene	8438	10297	+	1860
CFVI03293-P1	CDS	10393	11256	+	864		hypothetical protein
CFVI03293-P1	Gene	10393	11256	+	864
CFVI03293-P1	CDS	11259	11555	+	297		hypothetical protein
CFVI03293-P1	Gene	11259	11555	+	297
CFVI03293-P1	CDS	11552	11884	+	333		hypothetical protein
CFVI03293-P1	Gene	11552	11884	+	333
CFVI03293-P1	CDS	11887	12528	+	642		hypothetical protein
CFVI03293-P1	Gene	11887	12528	+	642
CFVI03293-P1	CDS	12700	13002	+	303		hypothetical protein
CFVI03293-P1	Gene	12700	13002	+	303
CFVI03293-P1	CDS	12995	14194	+	1200		ATPase, AAA family
CFVI03293-P1	Gene	12995	14194	+	1200
CFVI03293-P1	CDS	14197	14799	+	603		hypothetical protein
CFVI03293-P1	Gene	14197	14799	+	603
CFVI03293-P1	CDS	15028	15810	-	783		hypothetical protein
CFVI03293-P1	Gene	15028	15810	-	783
CFVI03293-P1	CDS	15946	16143	+	198		hypothetical protein
CFVI03293-P1	Gene	15946	16143	+	198
CFVI03293-P1	CDS	16362	16574	+	213		hypothetical protein
CFVI03293-P1	Gene	16362	16574	+	213
CFVI03293-P1	CDS	16574	19204	+	2631		hypothetical protein
CFVI03293-P1	Gene	16574	19204	+	2631
CFVI03293-P1	CDS	19485	20438	+	954		hypothetical protein
CFVI03293-P1	Gene	19485	20438	+	954
CFVI03293-P1	CDS	20487	20750	+	264		hypothetical protein
CFVI03293-P1	Gene	20487	20750	+	264
CFVI03293-P1	CDS	20910	21323	+	414		hypothetical protein
CFVI03293-P1	Gene	20910	21323	+	414
CFVI03293-P1	CDS	21379	21537	+	159		hypothetical protein
CFVI03293-P1	Gene	21379	21537	+	159
CFVI03293-P1	CDS	21525	21731	+	207		hypothetical protein
CFVI03293-P1	Gene	21525	21731	+	207
CFVI03293-P1	CDS	21770	22240	+	471		hypothetical protein
CFVI03293-P1	Gene	21770	22240	+	471
CFVI03293-P1	CDS	22242	22679	+	438		hypothetical protein
CFVI03293-P1	Gene	22242	22679	+	438
CFVI03293-P1	CDS	22676	22861	+	186		transcriptional regulator
CFVI03293-P1	Gene	22676	22861	+	186
CFVI03293-P1	CDS	22854	24080	+	1227		hypothetical protein
CFVI03293-P1	Gene	22854	24080	+	1227
CFVI03293-P1	CDS	24056	24352	+	297		hypothetical protein
CFVI03293-P1	Gene	24056	24352	+	297
CFVI03293-P1	CDS	24393	24548	+	156		hypothetical protein
CFVI03293-P1	Gene	24393	24548	+	156
CFVI03293-P1	CDS	24545	24655	+	111		hypothetical protein
CFVI03293-P1	Gene	24545	24655	+	111
CFVI03293-P1	CDS	24661	25131	-	471		hypothetical protein
CFVI03293-P1	Gene	24661	25131	-	471
CFVI03293-P1	CDS	25128	26717	-	1590		hypothetical protein
CFVI03293-P1	Gene	25128	26717	-	1590
CFVI03293-P1	CDS	26801	27001	-	201		phage portal protein
CFVI03293-P1	Gene	26801	27001	-	201
CFVI03293-P1	CDS	27082	27576	+	495		hypothetical protein
CFVI03293-P1	Gene	27082	27576	+	495
CFVI03293-P1	CDS	27576	28511	+	936		hypothetical protein (Pfam match to Phage_capsid PF05065.8)
CFVI03293-P1	Gene	27576	28511	+	936
CFVI03293-P1	CDS	28501	28800	+	300		hypothetical protein
CFVI03293-P1	Gene	28501	28800	+	300
CFVI03293-P1	CDS	28785	29150	+	366		hypothetical protein
CFVI03293-P1	Gene	28785	29150	+	366
CFVI03293-P1	CDS	29143	29841	+	699		hypothetical protein
CFVI03293-P1	Gene	29143	29841	+	699
CFVI03293-P1	CDS	29831	30295	+	465		hypothetical protein
CFVI03293-P1	Gene	29831	30295	+	465
CFVI03293-P1	CDS	30325	30540	+	216		hypothetical protein
CFVI03293-P1	Gene	30325	30540	+	216
CFVI03293-P1	CDS	30537	30710	-	174		hypothetical protein
CFVI03293-P1	Gene	30537	30710	-	174
CFVI03293-P1	CDS	30755	36052	+	5298		hypothetical protein
CFVI03293-P1	Gene	30755	36052	+	5298
CFVI03293-P1	CDS	36052	36909	+	858		hypothetical protein
CFVI03293-P1	Gene	36052	36909	+	858
CFVI03293-P1	CDS	36909	37664	+	756		hypothetical protein
CFVI03293-P1	Gene	36909	37664	+	756
CFVI03293-P1	CDS	37671	38141	+	471		hypothetical protein
CFVI03293-P1	Gene	37671	38141	+	471
CFVI03293-P1	CDS	38200	38646	+	447		hypothetical protein
CFVI03293-P1	Gene	38200	38646	+	447
CFVI03293-P1	CDS	38660	39553	+	894		hypothetical protein
CFVI03293-P1	Gene	38660	39553	+	894
CFVI03293-P1	CDS	39553	40152	+	600		hypothetical protein
CFVI03293-P1	Gene	39553	40152	+	600
CFVI03293-P1	mobile element	40066	41758	-	1693		insertion sequence:ISCfvi1C
CFVI03293-P1	CDS	40115	41215	-	1101		transposase, IS605 family OrfB
CFVI03293-P1	Gene	40115	41215	-	1101
CFVI03293-P1	CDS	41193	41648	-	456		transposase, IS200 family OrfA
CFVI03293-P1	Gene	41193	41648	-	456
CFVI03293-P1	CDS	41740	42105	-	366		hypothetical protein
CFVI03293-P1	Gene	41740	42105	-	366
CFVI03293-P1	CDS	42408	42647	+	240		hypothetical protein
CFVI03293-P1	Gene	42408	42647	+	240
CFVI03293-P1	CDS	42651	42836	+	186		hypothetical protein
CFVI03293-P1	Gene	42651	42836	+	186
CFVI03293-P1	CDS	42823	43023	+	201		hypothetical protein
CFVI03293-P1	Gene	42823	43023	+	201
CFVI03293-P1	CDS	43027	43233	+	207		hypothetical protein
CFVI03293-P1	Gene	43027	43233	+	207
CFVI03293-P1	CDS	43235	44197	+	963		hypothetical protein
CFVI03293-P1	Gene	43235	44197	+	963
CFVI03293-P1	CDS	44199	45014	+	816		Fic family protein
CFVI03293-P1	Gene	44199	45014	+	816
CFVI03293-P1	CDS	45014	45817	+	804		hypothetical protein
CFVI03293-P1	Gene	45014	45817	+	804
CFVI03293-P1	CDS	45874	47790	+	1917		hypothetical protein
CFVI03293-P1	Gene	45874	47790	+	1917
CFVI03293-P1	mobile element	47865	49932	+	2068		insertion sequence:ISCfvi2E
CFVI03293-P1	CDS	47968	48606	+	639		transposase, IS607 family OrfA
CFVI03293-P1	Gene	47968	48606	+	639
CFVI03293-P1	CDS	48593	49885	+	1293		transposase, IS605 family OrfB
CFVI03293-P1	Gene	48593	49885	+	1293
CFVI03293-P1	CDS	49913	50050	-	138		hypothetical protein
CFVI03293-P1	Gene	49913	50050	-	138
CFVI03293-P1	CDS	50057	50691	-	635		pseudo
CFVI03293-P1	Gene	50057	50691	-	635
CFVI03293-P1	misc feature	50692	50922	+	231		cryptic ISCfvi1 insertion sequence
CFVI03293-P1	CDS	50923	51312	-	390		pseudo, gene disrupted by IS fragment
CFVI03293-P1	Gene	50923	51312	-	390
CFVI03293-P1	CDS	51313	51492	-	180		hypothetical protein
CFVI03293-P1	Gene	51313	51492	-	180
CFVI03293-P1	CDS	51529	51855	-	327	virB4	type IV secretion system protein VirB4
CFVI03293-P1	Gene	51529	51855	-	327	virB4
CFVI03293-P1	CDS	51852	52844	-	993		hypothetical protein
CFVI03293-P1	Gene	51852	52844	-	993
CFVI03293-P1	CDS	53706	53966	-	261		hypothetical protein
CFVI03293-P1	Gene	53706	53966	-	261
CFVI03293-P1	CDS	55010	55252	+	243		hypothetical protein
CFVI03293-P1	Gene	55010	55252	+	243
CFVI03293-P1	CDS	55299	55697	+	399		hypothetical protein
CFVI03293-P1	Gene	55299	55697	+	399
CFVI03293-P1	CDS	55799	55886	+	88		hypothetical protein
CFVI03293-P1	Gene	55799	55886	+	88
CFVI03293-P1	CDS	55978	56367	+	390		hypothetical protein
CFVI03293-P1	Gene	55978	56367	+	390
CFVI03293-P1	CDS	56367	57071	+	705		hypothetical protein
CFVI03293-P1	Gene	56367	57071	+	705
CFVI03293-P1	mobile element	57094	58786	-	1693		insertion sequence:ISCfvi1D
CFVI03293-P1	CDS	57143	58243	-	1101		transposase, IS605 family OrfB
CFVI03293-P1	Gene	57143	58243	-	1101
CFVI03293-P1	CDS	58221	58676	-	456		transposase, IS200 family OrfA
CFVI03293-P1	Gene	58221	58676	-	456
CFVI03293-P1	CDS	58739	60601	-	1863		hypothetical protein
CFVI03293-P1	Gene	58739	60601	-	1863
CFVI03293-P1	CDS	60610	62970	-	2361		hypothetical protein
CFVI03293-P1	Gene	60610	62970	-	2361
CFVI03293-P1	CDS	62967	63521	-	555		conjugal transfer protein
CFVI03293-P1	Gene	62967	63521	-	555
CFVI03293-P1	CDS	63526	64152	-	627		hypothetical protein
CFVI03293-P1	Gene	63526	64152	-	627
CFVI03293-P1	CDS	64154	64639	-	486		hypothetical protein
CFVI03293-P1	Gene	64154	64639	-	486
CFVI03293-P1	CDS	64629	65348	-	720		hypothetical protein
CFVI03293-P1	Gene	64629	65348	-	720
CFVI03293-P1	CDS	65361	66209	-	849		hypothetical protein
CFVI03293-P1	Gene	65361	66209	-	849
CFVI03293-P1	CDS	66219	67379	-	1161		hypothetical protein
CFVI03293-P1	Gene	66219	67379	-	1161
CFVI03293-P1	CDS	67388	68023	-	636		hypothetical protein
CFVI03293-P1	Gene	67388	68023	-	636
CFVI03293-P1	CDS	68020	68949	-	930		hypothetical protein
CFVI03293-P1	Gene	68020	68949	-	930
CFVI03293-P1	CDS	68949	70268	-	1320		HNH endonuclease
CFVI03293-P1	Gene	68949	70268	-	1320
CFVI03293-P1	CDS	70470	70787	-	318		hypothetical protein
CFVI03293-P1	Gene	70470	70787	-	318
CFVI03293-P1	CDS	70795	71541	-	747		hypothetical protein
CFVI03293-P1	Gene	70795	71541	-	747
CFVI03293-P1	CDS	71551	72138	-	588		hypothetical protein
CFVI03293-P1	Gene	71551	72138	-	588
CFVI03293-P1	CDS	72150	72890	-	741		hypothetical protein
CFVI03293-P1	Gene	72150	72890	-	741
CFVI03293-P1	CDS	72887	73375	-	489		hypothetical protein
CFVI03293-P1	Gene	72887	73375	-	489
CFVI03293-P1	CDS	73375	73701	-	327		hypothetical protein
CFVI03293-P1	Gene	73375	73701	-	327
CFVI03293-P1	CDS	73744	74130	-	387		hypothetical protein
CFVI03293-P1	Gene	73744	74130	-	387
CFVI03293-P1	CDS	74554	74994	+	441		hypothetical protein
CFVI03293-P1	Gene	74554	74994	+	441
CFVI03293-P1	CDS	75074	75424	+	351		hypothetical protein
CFVI03293-P1	Gene	75074	75424	+	351
CFVI03293-P1	CDS	75687	76157	+	471		hypothetical protein
CFVI03293-P1	Gene	75687	76157	+	471
CFVI03293-P1	CDS	76292	77053	-	762		DNA adenine methylase
CFVI03293-P1	Gene	76292	77053	-	762
CFVI03293-P1	CDS	77107	77661	-	555		hypothetical protein
CFVI03293-P1	Gene	77107	77661	-	555
CFVI03293-P1	CDS	77648	77998	-	351		hypothetical protein
CFVI03293-P1	Gene	77648	77998	-	351
CFVI03293-P1	CDS	77998	78081	-	84		hypothetical protein
CFVI03293-P1	Gene	77998	78081	-	84
CFVI03293-P1	CDS	78078	78359	-	282		hypothetical protein
CFVI03293-P1	Gene	78078	78359	-	282
CFVI03293-P1	CDS	78226	78591	-	366		hypothetical protein
CFVI03293-P1	Gene	78226	78591	-	366
CFVI03293-P1	CDS	78588	79685	-	1098		hypothetical protein
CFVI03293-P1	Gene	78588	79685	-	1098
CFVI03293-P1	CDS	79660	80013	-	354		hypothetical protein
CFVI03293-P1	Gene	79660	80013	-	354
CFVI03293-P1	mobile element	80128	81820	+	1693		insertion sequence:ISCfvi1E
CFVI03293-P1	CDS	80238	80693	+	456		transposase, IS200 family OrfA
CFVI03293-P1	Gene	80238	80693	+	456
CFVI03293-P1	CDS	80671	81771	+	1101		transposase, IS605 family OrfB
CFVI03293-P1	Gene	80671	81771	+	1101
CFVI03293-P1	mobile element	81887	83954	+	2068		insertion sequence:ISCfvi2F
CFVI03293-P1	CDS	81990	82628	+	639		transposase, IS607 family OrfA
CFVI03293-P1	Gene	81990	82628	+	639
CFVI03293-P1	CDS	82615	83907	+	1293		transposase, IS605 family OrfB
CFVI03293-P1	Gene	82615	83907	+	1293
CFVI03293-P1	mobile element	84051	85743	-	1693		insertion sequence:ISCfvi1F
CFVI03293-P1	CDS	84100	85200	-	1101		transposase, IS605 family OrfB
CFVI03293-P1	Gene	84100	85200	-	1101
CFVI03293-P1	CDS	85178	85633	-	456		transposase, IS200 family OrfA
CFVI03293-P1	Gene	85178	85633	-	456
CFVI03293-P1	CDS	85820	86230	-	411	vapC	DNA-binding protein
CFVI03293-P1	Gene	85820	86230	-	411	vapC
CFVI03293-P1	CDS	86227	87057	-	831		hypothetical protein
CFVI03293-P1	Gene	86227	87057	-	831
CFVI03293-P1	CDS	87697	88035	-	339		hypothetical protein
CFVI03293-P1	Gene	87697	88035	-	339
CFVI03293-P1	CDS	88032	88307	-	276	yafQ	addiction module toxin, RelE/StbE family
CFVI03293-P1	Gene	88032	88307	-	276	yafQ
CFVI03293-P1	CDS	88300	88515	-	216		hypothetical protein
CFVI03293-P1	Gene	88300	88515	-	216
CFVI03293-P1	mobile element	88660	90352	-	1693		insertion sequence:ISCfvi1G
CFVI03293-P1	CDS	88709	89809	-	1101		transposase, IS605 family OrfB
CFVI03293-P1	Gene	88709	89809	-	1101
CFVI03293-P1	CDS	89787	90242	-	456		transposase, IS200 family OrfA
CFVI03293-P1	Gene	89787	90242	-	456
CFVI03293-P1	CDS	90416	90568	-	153		hypothetical protein
CFVI03293-P1	Gene	90416	90568	-	153
CFVI03293-P1	CDS	90572	91129	-	558		hypothetical protein
CFVI03293-P1	Gene	90572	91129	-	558
CFVI03293-P2	CDS	1	1077	+	1077		plasmid replication protein
CFVI03293-P2	Gene	1	1077	+	1077
CFVI03293-P2	CDS	1082	2095	-	1014		VapD domain protein
CFVI03293-P2	Gene	1082	2095	-	1014
CFVI03293-P2	CDS	2080	2409	-	330		hypothetical protein
CFVI03293-P2	Gene	2080	2409	-	330
CFVI03293-P2	CDS	2461	2688	-	228		hypothetical protein
CFVI03293-P2	Gene	2461	2688	-	228
CFVI03293-P2	CDS	2907	3446	+	540		hypothetical protein
CFVI03293-P2	Gene	2907	3446	+	540
CFVI03293-P2	CDS	3449	4612	+	1164		nickase/relaxase
CFVI03293-P2	Gene	3449	4612	+	1164
CFVI03293-P2	CDS	4626	5273	+	648		hypothetical protein
CFVI03293-P2	Gene	4626	5273	+	648
CFVI03293-P2	CDS	5638	5898	-	261		hypothetical protein
CFVI03293-P2	Gene	5638	5898	-	261
CFVI03293-P2	CDS	6068	7015	+	948		hypothetical protein
CFVI03293-P2	Gene	6068	7015	+	948
CFVI03293-P2	CDS	7016	7573	+	558		hypothetical protein
CFVI03293-P2	Gene	7016	7573	+	558
CFVI03293-P2	CDS	7584	8267	+	684		hypothetical protein
CFVI03293-P2	Gene	7584	8267	+	684
CFVI03293-P2	CDS	8296	8520	+	225		hypothetical protein
CFVI03293-P2	Gene	8296	8520	+	225
CFVI03293-P2	CDS	8616	8882	-	267		hypothetical protein
CFVI03293-P2	Gene	8616	8882	-	267
CFVI03293-P2	CDS	9129	9698	+	570		hypothetical protein
CFVI03293-P2	Gene	9129	9698	+	570
CFVI03293-P2	CDS	9683	9940	+	258		hypothetical protein
CFVI03293-P2	Gene	9683	9940	+	258
CFVI03293-P2	CDS	10000	15954	-	5955		DNA methylase/helicase
CFVI03293-P2	Gene	10000	15954	-	5955
CFVI03293-P2	CDS	16072	17094	-	1023		hypothetical protein
CFVI03293-P2	Gene	16072	17094	-	1023
CFVI03293-P2	CDS	17091	17594	-	504		lytic transglycosylase
CFVI03293-P2	Gene	17091	17594	-	504
CFVI03293-P2	CDS	17584	17739	-	156		single-stranded DNA-binding protein
CFVI03293-P2	Gene	17584	17739	-	156
CFVI03293-P2	CDS	17750	18172	-	423		hypothetical protein
CFVI03293-P2	Gene	17750	18172	-	423
CFVI03293-P2	CDS	18188	20131	-	1944		DNA topoisomerase I
CFVI03293-P2	Gene	18188	20131	-	1944
CFVI03293-P2	CDS	20227	20916	-	690		hypothetical protein
CFVI03293-P2	Gene	20227	20916	-	690
CFVI03293-P2	CDS	20920	21963	-	1044		hypothetical protein
CFVI03293-P2	Gene	20920	21963	-	1044
CFVI03293-P2	CDS	21953	22681	-	729	trbM	TrbM mating pair formation protein
CFVI03293-P2	Gene	21953	22681	-	729	trbM
CFVI03293-P2	CDS	22678	23118	-	441		Cag12 family protein
CFVI03293-P2	Gene	22678	23118	-	441
CFVI03293-P2	CDS	23115	25016	-	1902	virD4	type IV secretion system protein VirD4
CFVI03293-P2	Gene	23115	25016	-	1902	virD4
CFVI03293-P2	CDS	25013	25957	-	945	virB11	type IV secretion system protein VirB11
CFVI03293-P2	Gene	25013	25957	-	945	virB11
CFVI03293-P2	CDS	25947	27152	-	1206	virB10	type IV secretion system protein VirB10
CFVI03293-P2	Gene	25947	27152	-	1206	virB10
CFVI03293-P2	CDS	27145	28083	-	939	virB9	type IV secretion system protein VirB9
CFVI03293-P2	Gene	27145	28083	-	939	virB9
CFVI03293-P2	CDS	28073	28243	-	171		hypothetical protein
CFVI03293-P2	Gene	28073	28243	-	171
CFVI03293-P2	CDS	28233	28904	-	672	virB8	type IV secretion system protein VirB8
CFVI03293-P2	Gene	28233	28904	-	672	virB8
CFVI03293-P2	CDS	28901	29077	-	177		hypothetical protein
CFVI03293-P2	Gene	28901	29077	-	177
CFVI03293-P2	CDS	29074	30180	-	1107	virB6	type IV secretion system protein VirB6
CFVI03293-P2	Gene	29074	30180	-	1107	virB6
CFVI03293-P2	CDS	30184	30930	-	747	virB5	type IV secretion system protein VirB5
CFVI03293-P2	Gene	30184	30930	-	747	virB5
CFVI03293-P2	CDS	30941	33694	-	2754	virB3/4	type IV secretion system protein, fused VirB3/VirB4
CFVI03293-P2	Gene	30941	33694	-	2754	virB3/4
CFVI03293-P2	CDS	33701	34018	-	318	virB2	type IV secretion system protein VirB2
CFVI03293-P2	Gene	33701	34018	-	318	virB2
CFVI03293-P2	CDS	34080	34355	-	276		hypothetical protein
CFVI03293-P2	Gene	34080	34355	-	276
CFVI03293-P2	CDS	34579	34791	+	213		hypothetical protein
CFVI03293-P2	Gene	34579	34791	+	213
CFVI03293-P3	CDS	1	309	+	309	mobC	mobilization protein
CFVI03293-P3	Gene	1	309	+	309	mobC
CFVI03293-P3	CDS	299	1657	+	1359		relaxase/mobilization nuclease domain protein
CFVI03293-P3	Gene	299	1657	+	1359
CFVI03293-P3	CDS	1779	1985	-	207		hypothetical protein
CFVI03293-P3	Gene	1779	1985	-	207
CFVI03293-P3	CDS	1982	2260	-	279		hypothetical protein
CFVI03293-P3	Gene	1982	2260	-	279
CFVI03293-P3	CDS	2303	3361	-	1059		replication initiation protein
CFVI03293-P3	Gene	2303	3361	-	1059
CFVI03293-P3	CDS	3498	3683	-	186		hypothetical protein
CFVI03293-P3	Gene	3498	3683	-	186

## Sheet: CFVi-ADRI545-P1
Plasmid	ftype	start	end	orientation	length_bp	gene	product
CFVi-ADRI545-P1	CDS	80	907	+	828	smc	Chromosome partition protein Smc
CFVi-ADRI545-P1	gene	80	907	+	828	smc
CFVi-ADRI545-P1	CDS	963	1190	+	228		putative protein [Campylobacter fetus subsp. fetus]
CFVi-ADRI545-P1	sig_peptide	963	1040	+	78		putative signal peptide
CFVi-ADRI545-P1	gene	963	1190	+	228
CFVi-ADRI545-P1	CDS	1144	2361	+	1218		P-type conjugative transfer protein TrbL [Campylobacter coli]
CFVi-ADRI545-P1	gene	1144	2361	+	1218
CFVi-ADRI545-P1	CDS	2499	3182	+	684		Conjugal transfer protein TrbF [Campylobacter coli]
CFVi-ADRI545-P1	gene	2499	3182	+	684
CFVi-ADRI545-P1	CDS	3201	4115	+	915	virB9	Type IV secretion system protein virB9
CFVi-ADRI545-P1	sig_peptide	3201	3257	+	57		putative signal peptide
CFVi-ADRI545-P1	gene	3201	4115	+	915	virB9
CFVi-ADRI545-P1	CDS	4116	4553	+	438		Helix-turn-helix transcriptional regulator [Olleya sp. Bg11-27]
CFVi-ADRI545-P1	gene	4116	4553	+	438
CFVi-ADRI545-P1	CDS	4563	5780	+	1218		Type IV secretion system protein virB10
CFVi-ADRI545-P1	gene	4563	5780	+	1218
CFVi-ADRI545-P1	CDS	5777	6568	+	792	virB1	Type IV secretion system protein virB1
CFVi-ADRI545-P1	gene	5777	6568	+	792	virB1
CFVi-ADRI545-P1	CDS	6565	6924	+	360	ssb	Single-stranded DNA-binding protein
CFVi-ADRI545-P1	gene	6565	6924	+	360	ssb
CFVi-ADRI545-P1	CDS	6917	7069	+	153		putative protein [Campylobacter fetus subsp. fetus]
CFVi-ADRI545-P1	gene	6917	7069	+	153
CFVi-ADRI545-P1	CDS	7059	9230	+	2172	traC	DNA primase TraC
CFVi-ADRI545-P1	gene	7059	9230	+	2172	traC
CFVi-ADRI545-P1	CDS	9243	11078	+	1836	traG	Conjugal transfer protein TraG
CFVi-ADRI545-P1	gene	9243	11078	+	1836	traG
CFVi-ADRI545-P1	CDS	11075	11782	+	708	traL	Protein TraL
CFVi-ADRI545-P1	gene	11075	11782	+	708	traL
CFVi-ADRI545-P1	CDS	11902	12150	+	249		hypothetical protein
CFVi-ADRI545-P1	gene	11902	12150	+	249
CFVi-ADRI545-P1	CDS	12134	12775	+	642	vbhT	Adenosine monophosphate-protein transferase VbhT
CFVi-ADRI545-P1	gene	12134	12775	+	642	vbhT
CFVi-ADRI545-P1	CDS	12837	13304	+	468		Signal peptidase I [Campylobacter coli]
CFVi-ADRI545-P1	gene	12837	13304	+	468
CFVi-ADRI545-P1	CDS	13291	13662	+	372		Conjugal transfer protein TraM [Campylobacter coli]
CFVi-ADRI545-P1	gene	13291	13662	+	372
CFVi-ADRI545-P1	CDS	13763	14449	+	687	soj_1	Chromosome-partitioning ATPase Soj
CFVi-ADRI545-P1	gene	13763	14449	+	687	soj_1
CFVi-ADRI545-P1	CDS	14452	14667	+	216		hypothetical protein
CFVi-ADRI545-P1	gene	14452	14667	+	216
CFVi-ADRI545-P1	CDS	14740	14928	-	189		Relaxase/mobilisation nuclease domain-containing protein [Campylobacter fetus]
CFVi-ADRI545-P1	gene	14740	14928	-	189
CFVi-ADRI545-P1	CDS	15087	16379	-	1293		Transposase [Campylobacter sp.]
CFVi-ADRI545-P1	gene	15087	16379	-	1293
CFVi-ADRI545-P1	CDS	16366	17004	-	639		putative protein
CFVi-ADRI545-P1	gene	16366	17004	-	639
CFVi-ADRI545-P1	CDS	17168	18388	+	1221	dnaG	DNA primase
CFVi-ADRI545-P1	gene	17168	18388	+	1221	dnaG
CFVi-ADRI545-P1	CDS	18385	18639	+	255		putative protein [Campylobacter fetus subsp. fetus]
CFVi-ADRI545-P1	gene	18385	18639	+	255
CFVi-ADRI545-P1	CDS	18636	18851	+	216		N-6 DNA methylase [Campylobacter concisus]
CFVi-ADRI545-P1	gene	18636	18851	+	216
CFVi-ADRI545-P1	CDS	19054	19764	+	711		hypothetical protein
CFVi-ADRI545-P1	gene	19054	19764	+	711
CFVi-ADRI545-P1	CDS	19832	20149	+	318		Multispecies: RagB/SusD family nutrient uptake outer membrane protein [Bacteroides]
CFVi-ADRI545-P1	gene	19832	20149	+	318
CFVi-ADRI545-P1	CDS	20174	20836	+	663	soj_2	Chromosome-partitioning ATPase Soj
CFVi-ADRI545-P1	gene	20174	20836	+	663	soj_2
CFVi-ADRI545-P1	CDS	20904	21215	+	312		Nucleotidyltransferase domain-containing protein [Campylobacter fetus]
CFVi-ADRI545-P1	gene	20904	21215	+	312
CFVi-ADRI545-P1	CDS	21208	21639	+	432		hypothetical protein
CFVi-ADRI545-P1	gene	21208	21639	+	432
CFVi-ADRI545-P1	CDS	21643	22479	+	837		Cell filamentation protein Fic [Campylobacter hyointestinalis]
CFVi-ADRI545-P1	gene	21643	22479	+	837
CFVi-ADRI545-P1	CDS	22479	23399	+	921		Cell filamentation protein Fic [Campylobacter hyointestinalis]
CFVi-ADRI545-P1	gene	22479	23399	+	921
CFVi-ADRI545-P1	CDS	23399	23668	+	270		hypothetical protein
CFVi-ADRI545-P1	gene	23399	23668	+	270
CFVi-ADRI545-P1	CDS	23677	25014	-	1338		Relaxase/mobilisation nuclease domain-containing protein [Campylobacter concisus]
CFVi-ADRI545-P1	gene	23677	25014	-	1338
CFVi-ADRI545-P1	CDS	25011	25574	-	564		Plasmid mobilization relaxosome protein MobC [Parashewanella sp.]
CFVi-ADRI545-P1	gene	25011	25574	-	564
CFVi-ADRI545-P1	CDS	25912	26043	-	132		Marr family transcriptional regulator [Rhodobacteraceae bacterium]
CFVi-ADRI545-P1	gene	25912	26043	-	132
CFVi-ADRI545-P1	CDS	26255	26410	+	156		hypothetical protein
CFVi-ADRI545-P1	gene	26255	26410	+	156
CFVi-ADRI545-P1	CDS	26530	27354	+	825		putative protein [Campylobacter fetus subsp. fetus]
CFVi-ADRI545-P1	gene	26530	27354	+	825
CFVi-ADRI545-P1	CDS	27351	27764	+	414		Type II toxin-antitoxin system VapC family toxin [Campylobacter coli]
CFVi-ADRI545-P1	gene	27351	27764	+	414
CFVi-ADRI545-P1	CDS	28066	29007	+	942		Type IV secretion system protein VirB11
CFVi-ADRI545-P1	gene	28066	29007	+	942
CFVi-ADRI545-P1	CDS	29021	29314	+	294		Conjugal transfer protein TrbC [Campylobacter coli]
CFVi-ADRI545-P1	gene	29021	29314	+	294
CFVi-ADRI545-P1	CDS	29311	29601	+	291		Conjugal transfer protein TrbD [Campylobacter coli]
CFVi-ADRI545-P1	gene	29311	29601	+	291
CFVi-ADRI545-P1	CDS	29604	32063	+	2460	virB4_1	Type IV secretion system protein virB4
CFVi-ADRI545-P1	gene	29604	32063	+	2460	virB4_1
CFVi-ADRI545-P1	CDS	32060	32290	+	231		Bro-n domain-containing protein [Campylobacter fetus]
CFVi-ADRI545-P1	gene	32060	32290	+	231
CFVi-ADRI545-P1	CDS	32187	32612	-	426		hypothetical protein
CFVi-ADRI545-P1	gene	32187	32612	-	426
CFVi-ADRI545-P1	CDS	32946	33185	+	240		Type II toxin-antitoxin system HicA family toxin [Bathymodiolus septemdierum thioautotrophic gill symbiont]
CFVi-ADRI545-P1	gene	32946	33185	+	240
CFVi-ADRI545-P1	CDS	33209	33616	+	408		Type II toxin-antitoxin system HicB family antitoxin [Campylobacter jejuni]
CFVi-ADRI545-P1	gene	33209	33616	+	408
CFVi-ADRI545-P1	CDS	33638	34039	+	402		Ligase protein, partial [Parcubacteria group bacterium_GWF2_44_8]
CFVi-ADRI545-P1	gene	33638	34039	+	402
CFVi-ADRI545-P1	CDS	34058	35224	-	1167		Spore coat protein CotH [Campylobacter jejuni]
CFVi-ADRI545-P1	gene	34058	35224	-	1167
CFVi-ADRI545-P1	CDS	35227	35766	-	540		Copg family domain Ribbon-helix-helix protein [Campylobacter jejuni]
CFVi-ADRI545-P1	gene	35227	35766	-	540
CFVi-ADRI545-P1	CDS	36000	36215	+	216		Related to polyketide synthase [Phialocephala subalpina]
CFVi-ADRI545-P1	gene	36000	36215	+	216
CFVi-ADRI545-P1	CDS	36208	36483	+	276	yafQ	mRNA interferase toxin YafQ
CFVi-ADRI545-P1	gene	36208	36483	+	276	yafQ
CFVi-ADRI545-P1	CDS	36480	36830	+	351		hypothetical protein
CFVi-ADRI545-P1	gene	36480	36830	+	351
CFVi-ADRI545-P1	CDS	36778	37647	+	870		putative protein [Campylobacter upsaliensis]
CFVi-ADRI545-P1	gene	36778	37647	+	870
CFVi-ADRI545-P1	CDS	37979	38134	+	156		hypothetical protein
CFVi-ADRI545-P1	gene	37979	38134	+	156
CFVi-ADRI545-P1	CDS	38254	39078	+	825		putative protein [Campylobacter fetus subsp. fetus]
CFVi-ADRI545-P1	gene	38254	39078	+	825
CFVi-ADRI545-P1	CDS	39075	39227	+	153		Type II toxin-antitoxin system VapC family toxin [Campylobacter coli]
CFVi-ADRI545-P1	gene	39075	39227	+	153
CFVi-ADRI545-P1	CDS	39472	39822	+	351		Marr family transcriptional regulator [Campylobacter corcagiensis]
CFVi-ADRI545-P1	gene	39472	39822	+	351
CFVi-ADRI545-P1	CDS	39948	40295	+	348		putative protein [Campylobacter fetus subsp. fetus]
CFVi-ADRI545-P1	gene	39948	40295	+	348
CFVi-ADRI545-P1	CDS	40292	40702	+	411		Type II toxin-antitoxin system VapC family toxin [Campylobacter coli]
CFVi-ADRI545-P1	gene	40292	40702	+	411
CFVi-ADRI545-P1	CDS	40991	41446	+	456		Is200/is605 family transposase [Helicobacter pylori]
CFVi-ADRI545-P1	gene	40991	41446	+	456
CFVi-ADRI545-P1	CDS	41424	42524	+	1101		Transposase [Helicobacter pylori]
CFVi-ADRI545-P1	gene	41424	42524	+	1101
CFVi-ADRI545-P1	CDS	42722	43666	+	945		Type IV secretion system protein VirB11
CFVi-ADRI545-P1	gene	42722	43666	+	945
CFVi-ADRI545-P1	CDS	43687	43980	+	294		Conjugal transfer protein TrbC [Campylobacter coli]
CFVi-ADRI545-P1	sig_peptide	43687	43740	+	54		putative signal peptide
CFVi-ADRI545-P1	gene	43687	43980	+	294
CFVi-ADRI545-P1	CDS	43977	44267	+	291		Conjugal transfer protein TrbD [Campylobacter coli]
CFVi-ADRI545-P1	gene	43977	44267	+	291
CFVi-ADRI545-P1	CDS	44271	46730	+	2460	virB4_2	Type IV secretion system protein virB4
CFVi-ADRI545-P1	gene	44271	46730	+	2460	virB4_2
CFVi-ADRI545-P1	CDS	46727	47266	+	540		Multispecies: Bro-N domain-containing protein [Campylobacter]
CFVi-ADRI545-P1	gene	46727	47266	+	540
CFVi-ADRI545-P1	CDS	47263	48003	+	741		Conjugal transfer protein TrbM [Campylobacter jejuni]
CFVi-ADRI545-P1	sig_peptide	47263	47319	+	57		putative signal peptide
CFVi-ADRI545-P1	gene	47263	48003	+	741

[truncated: 1 more sheets: CFVi-ADRI1362-P1 to P4]
